# 1 Unified neural dynamics of decisions and actions in the cerebral 2 cortex and basal ganglia

3 David Thura<sup>†</sup>, Jean-François Cabana<sup>‡</sup>, Albert Feghaly<sup>\*</sup>, and Paul Cisek

4 *Groupe de recherche sur le système nerveux central*

5 *Department of Neuroscience*

6 *Université de Montréal*

7 *Montréal, QC, CANADA*

8

## 9 Abstract

10 Several theoretical models suggest that deciding about actions and executing them are not completely  
11 distinct neural mechanisms but instead two modes of an integrated dynamical system. Here, we  
12 investigate this proposal by examining how neural activity unfolds during a dynamic decision-making  
13 task within the high-dimensional space defined by the activity of cells in monkey dorsal premotor  
14 (PMd), primary motor (M1), and dorsolateral prefrontal cortex (dlPFC) as well as the external and  
15 internal segments of the globus pallidus (GPe, GPi). Dimensionality reduction shows that the four  
16 strongest components of neural activity are functionally interpretable, reflecting a state transition  
17 between deliberation and commitment, the transformation of sensory evidence into a choice, and the  
18 baseline and slope of the rising urgency to decide. Analysis of the contribution of each population to  
19 these components shows differences between regions but no distinct clusters within each region.  
20 During deliberation, cortical activity unfolds on a two-dimensional “decision manifold” defined by  
21 sensory evidence and urgency, and falls off this manifold at the moment of commitment into a choice-  
22 dependent trajectory leading to movement initiation. The structure of the manifold varies between  
23 regions: In PMd it is curved, in M1 it is nearly perfectly flat, and in dlPFC it is almost entirely  
24 confined to the sensory evidence dimension. In contrast, pallidal activity during deliberation is  
25 primarily defined by urgency. We suggest that these findings reveal the distinct dynamics of different  
26 regions, supporting a unified recurrent attractor model of action selection and execution.

27

28 Present affiliations:

29 †: CRNL – ImpAct team, Inserm U1028 – University of Lyon 1, 69675 Bron (France) – david.thura@inserm.fr

30 ‡: Integrated Regional Center of Cancerology (CRIC), Lévis, QC (Canada) - [jfcabana@outlook.com](mailto:jfcabana@outlook.com)

31 \*: Institute for Research in Immunology and Cancer of the University of Montréal, Montréal, QC (Canada) -  
32 [albert.feghaly@umontreal.ca](mailto:albert.feghaly@umontreal.ca)

33 Corresponding author:

34 Paul Cisek, [paul.cisek@umontreal.ca](mailto:paul.cisek@umontreal.ca)

35

## 36 Introduction

37 During natural behavior, we are continuously interacting with a complex and dynamic world<sup>1,2</sup>. That  
38 world often does not wait for us to make up our minds about perceptual judgments or optimal choices,  
39 and inaction can lead to lost opportunities, or worse. Furthermore, we must often make decisions  
40 while we're already engaged in an action, such as while navigating through our environment or  
41 playing a sport<sup>3</sup>. These considerations suggest that the neural mechanisms involved in selecting and  
42 executing actions should be closely integrated within a unified sensorimotor control system<sup>4</sup>. Indeed,  
43 many neural studies have shown considerable overlap between the brain regions involved in action  
44 selection and sensorimotor control<sup>5-10</sup>.

45 However, while the anatomical overlap between the distributed circuits of decision-making and  
46 sensorimotor control is well-established, theoretical models of these processes remain largely  
47 separate. Decision-making is often modeled as the accumulation of evidence until a threshold is  
48 reached<sup>11-19</sup>, at which time a target is chosen. Models of movement control usually begin with that  
49 chosen target, toward which the system is guided through feedback and feedforward mechanisms<sup>20-22</sup>.  
50 But if the neural circuits involved in action selection and sensorimotor control are truly as unified as  
51 neural data suggests, then theories of these processes should be similarly unified. One promising  
52 avenue toward an integrated account of selection and control is to consider both as aspects of a single  
53 distributed dynamical system, which transitions from a biased competition between actions<sup>23-28</sup> into  
54 an “attractor” that specifies the initial conditions for implementing the chosen action through feedback  
55 control<sup>29-31</sup>.

56 Here, we test whether neural activity in key cortical and subcortical regions exhibits properties that  
57 would be expected from a unified dynamical system for action selection and sensorimotor control. We  
58 focus on cells recorded in monkey dorsal premotor (PMd) and primary motor cortex (M1), which are  
59 implicated in both selection and control<sup>7,9,32-36</sup>, as well as the dorsolateral prefrontal cortex (dlPFC),  
60 which is implicated in representing chosen actions<sup>37</sup>. In addition, we examine activity in the output  
61 nuclei of the basal ganglia, the globus pallidus externus (GPe) and internus (GPi), whose role in  
62 selection and/or motor control is under vigorous debate<sup>38-41</sup>. Importantly, we examine the activity of  
63 all of these regions recorded in the same animals performing the same reach selection task, making it  
64 possible to quantitatively compare activities in different brain areas using the same metrics.

65 To disentangle neural activity related to deliberation, commitment, and movement, we trained  
66 monkeys to perform the “tokens task” (Figure 1) (see Methods). In the task, the subject must guess  
67 which of two targets will receive the majority of tokens jumping randomly from a central circle every  
68 200ms (Figure 1a). The subject does not have to wait until all tokens have jumped, but can take an  
69 early guess, and after a target is reached the remaining tokens jump more quickly (every 150ms or  
70 50ms in separate “Slow” and “Fast” blocks of trials). Thus, subjects are faced with a speed-accuracy  
71 trade-off (SAT) – to either wait to be confident about making the correct choice, or to take an early  
72 guess and save some time, potentially increasing their overall reward rate. If we assume that  
73 commitment occurs shortly before movement onset, then we can delimit within each trial a period of  
74 deliberation (Figure 1b) during which neural activity should correlate with the sensory evidence  
75 related to token jumps as well as to subjective policies related to the speed-accuracy trade-off.  
76 Furthermore, because we can precisely quantify the success probability (SP) associated with each  
77 choice after every token jump, we can compute for each trial a temporal profile of the sensory  
78 evidence and categorize trials into similarity classes (Figure 1c), including “easy trials”, “ambiguous  
79 trials”, and “misleading trials” (see Methods for details).

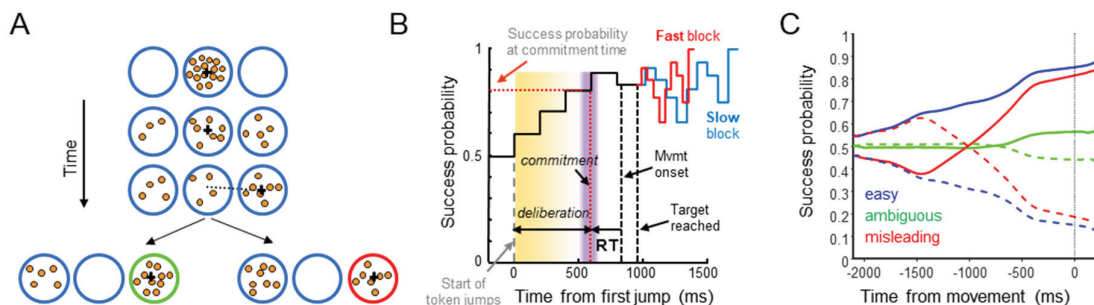

Figure 1. The “tokens task”. **A.** During each trial, 15 tokens jump, one every 200ms, from the central circle to one of two outer target circles. The subject’s task is to move the cursor (black cross) to the target that will ultimately receive the majority of the tokens. **B.** Temporal profile of the “success probability” that a given target is correct. Once a target is reached, the remaining token jumps accelerate to one every 150ms (“Slow” block) or 50ms (“Fast” block). We subtract from movement onset the mean reaction time (RT), measured in a separate delayed-response task, to estimate commitment time (purple bar) and the success probability at commitment time (dotted red horizontal line). **C.** Success probability for choosing the right target in trial types defined on the basis of the success probability profile, here computed after aligning to movement onset (see Methods). Solid: correct target on the right; Dashed: correct target on the left.

80 Previous studies have shown that both human and monkey behavior in the tokens task is well-  
 81 explained by the “urgency-gating model” (UGM)<sup>14,42</sup>, which suggests that during deliberation, the  
 82 sensory “evidence” about each choice (provided by the token distribution) is continuously updated  
 83 and combined with a non-specific “urgency signal”, which grows over time in a block-dependent  
 84 manner, and commitment to a given choice is made when the product of these reaches a threshold.  
 85 Recent neural recordings largely supported these proposals (Extended Data Figure 2). For example,  
 86 some cells in PMd (29%) and M1 (45%) were significantly tuned during deliberation, reflecting both  
 87 the evidence favoring their preferred target and the growing urgency signal<sup>36,43</sup>. In contrast, cells in  
 88 GPe and GPi did not show tuning until after commitment, and about 50% exhibited either increasing  
 89 or decreasing activity that resembled the context-dependent urgency signal<sup>44</sup>.

90 While these and other studies reveal important properties of activity in these regions, many questions  
 91 remain. Are “decision-related” neurons part of a module for choosing a target, which sends its output  
 92 to a separate module of “movement-related” neurons? Do the basal ganglia contribute to the  
 93 deliberation process<sup>39,45–49</sup> or do they simply reflect a choice taken in cortical regions<sup>50,51</sup> and  
 94 contribute only to movement execution<sup>52</sup>? Answering these questions is difficult given the  
 95 heterogeneity of cell properties<sup>7,32,53–56</sup> and their apparently continuous distribution along rostrocaudal  
 96 gradients<sup>54,57</sup> or layers<sup>58</sup>. This leads one to consider whether, instead of serial modules, action  
 97 selection and execution are two modes of a unified recurrent system distributed across the  
 98 frontoparietal cerebral cortex and associated basal ganglia/thalamic loops. According to this model<sup>59</sup>,  
 99 action selection occurs through a competition within the regions of PMd and M1 associated with the  
 100 relevant effector, biased by signals arriving from dlPFC related to evidence in favor of specific  
 101 targets. As time passes, that competition is invigorated by an urgency signal coming from the basal  
 102 ganglia, which gradually amplifies the competitive dynamics in PMd/M1. As the contrast develops  
 103 between the activity of cortical cell groups associated with different candidate actions, selectivity is  
 104 gradually induced in the striatum and the pallidum, leading to a positive feedback that further favors  
 105 the winning cells and suppresses the others, constituting volitional commitment and launching the  
 106 dynamics of execution<sup>29–31</sup>.

107 Here, we test this proposal by examining activity across all of the regions we recorded in the tokens  
 108 task (PMd, M1, GPe, GPi, and dlPFC), but without *a priori* classifying cells into putative functional  
 109 categories. Instead, we use the neural space approach pioneered in recent years<sup>60–70</sup>, in which the  
 110 entire system is described as a point in a very high-dimensional space defined by the activity of all

111 recorded cells, and then reduced into a lower-dimensional representation that reveals the main factors  
112 governing cell activity across the system. We then perform specific analyses to characterize how  
113 activity unfolds during deliberation and commitment, comparing the dynamics of different regions,  
114 and quantify to what extent cell properties cluster into distinct functionally interpretable roles. Some  
115 of these results have previously appeared in abstract form<sup>71-74</sup>.

116

## 117 Results

### 118 Neural data

119 We recorded spiking activity from a total of 736 well-isolated individual neurons in the cerebral  
120 cortex and basal ganglia of two monkeys (S and Z), recorded at the locations shown in Extended Data  
121 Figure 1. Of these, 356 were recorded in PMd (237 from monkey S), 211 in M1 (79 from monkey S),  
122 62 in dlPFC (60 from monkey S), 51 in GPe (19 from monkey S), and 56 in GPi (22 from monkey S).  
123 The properties of some of these neurons have been reported in previous publications, focusing on  
124 tuned activity in PMd and M1 and the basal ganglia<sup>36,43,44,75</sup>, as summarized in Extended Data Figure  
125 2. Here, we additionally include neurons recorded in dlPFC, which for technical reasons were almost  
126 exclusively obtained in monkey S and to date only described in abstract form<sup>71,72</sup>. While a more  
127 complete description of their properties awaits more recordings in additional animals, they are  
128 included in the analyses described below, in part to provide a contrast to the other cortical and  
129 subcortical areas.

### 130 Dimensionality reduction of neural activity into principal components

131 To examine how the activity of this entire population evolves over time during the task, we performed  
132 Principal Components Analysis (PCA) on all cells recorded in all five brain regions, including any  
133 well isolated neuron that was recorded in both Slow and Fast blocks. This included a total of 637  
134 neurons, including 277 in PMd, 191 in M1, 52 in dlPFC, 41 in GPe and 46 in GPi. For the PCA, we  
135 used data from only four conditions (right and left choices in the fast and slow blocks) and counted  
136 each neuron once. This means that the variance explained was dominated by the PMd and M1  
137 populations, in which we recorded the largest number of neurons. However, reducing the number of  
138 cells to 35 in each region did not change the results apart from making them noisier and changing the  
139 percentage of variance explained by individual principal components (PCs) (See Extended Data  
140 Figure 6a). An alternative approach would be to perform PCA on each population of neurons  
141 separately, but this would yield region-specific PCs that make quantitative comparisons between  
142 regions impossible. Thus, we elected to perform PCA on all cells together, counting each neuron  
143 once, producing a “loading matrix” of coefficients (from each neuron to each PC) that then allows us  
144 to “project” each population into the space of the same PCs. As shown below, this allows us to  
145 directly compare the components of different regions and to infer how each region contributes to the  
146 same distributed dynamical system. We imposed symmetry on our population by following the “anti-  
147 neuron” assumption, which assumes that for every neuron we recorded there exists a similar neuron  
148 with the opposite relationship to target direction (even for cells that are not tuned), effectively  
149 doubling the number of neurons. See the Methods section for the justification and motivation for this  
150 approach.

151 The first 20 PCs together explained 97.9% of the variance in activity over time across the four groups  
152 of trials (slow/fast blocks x left/right choices) used for the Principal Components Analysis. Figure 2  
153 shows the temporal profile for the first 7 PCs constructed as a weighted average of all cells, separately  
154 for easy, ambiguous, and misleading trials in both slow and fast blocks, for both left and right choices.  
155 Here, the PCs are calculated after aligning the data to movement onset. See Extended Data Figure 3  
156 for the same PCs calculated after aligning to the beginning of the trial.



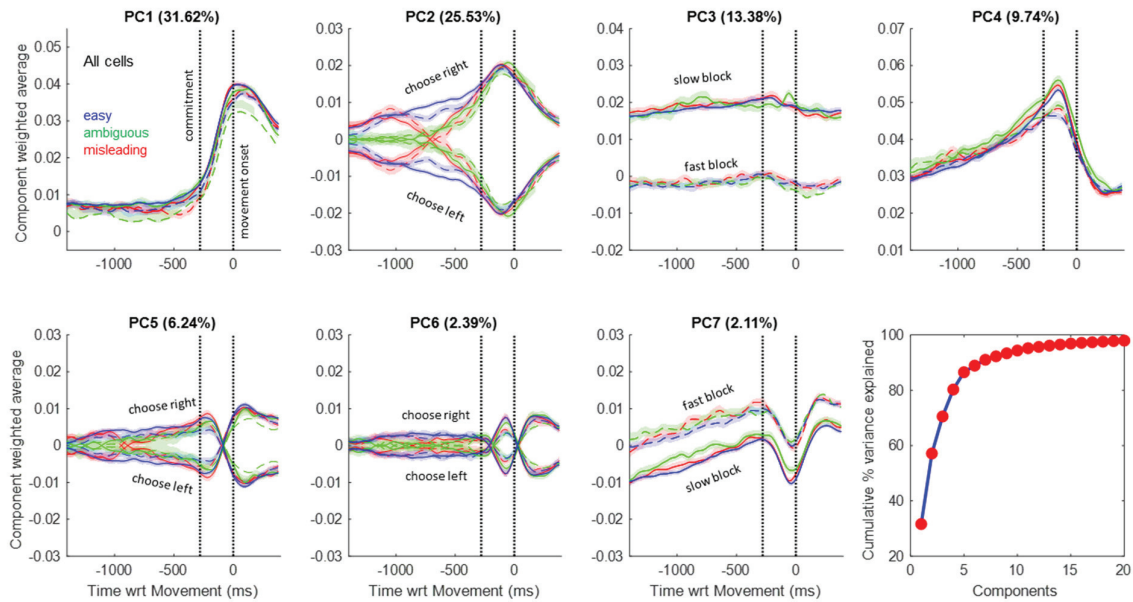

Figure 2. Components produced by PCA. The cumulative variance explained by the first 20 components is shown at the bottom right, and the temporal profiles of the top 7 PCs are shown in the rest of the figure. Each of those 7 panels shows the average activity of all cells, weighted by their loading coefficient onto the given PC, for 12 trial groups, including combinations of 3 trial types: easy (blue), ambiguous (green), and misleading (red); two blocks: Slow (solid) and Fast (dashed); for choices made to the left or right (indicated for the components where they differ). Note that the sign is arbitrary because the loading matrix can have positive or negative values. Shaded regions indicate 95% confidence intervals. In each panel, the second vertical dotted line indicates movement onset and the first indicates the estimated moment of commitment, 280ms earlier, based on our prior studies. Each panel is scaled to have the same range in the y-axis. PCs for the Slow trials are built from 557 cells that have all trial types in Slow blocks, while PCs for Fast trials are built from 452 cells that have all trial types in Fast blocks.

157 The first 4 components, which together explain 80.3% of total variance, are clearly interpretable in  
 158 terms of the key elements of the urgency gating model. The first PC (31.62% of variance) is nearly  
 159 identical across all conditions and reflects the transition between deliberation (prior to commitment)  
 160 and action (after movement onset). It is similar to the main condition-independent component  
 161 reported in other neural space studies in both primates<sup>76-80</sup> and rodents<sup>81-83</sup>. The second PC (25.53%)  
 162 exhibits two phases. Prior to commitment, it reflects the time course of the sensory evidence on which  
 163 the monkey made his choice, distinguishing easy, ambiguous, and misleading trials. After  
 164 commitment, it simply reflects the choice made without distinguishing trial types. The third PC  
 165 (13.38%) reflects the block-dependent aspect of urgency, distinguishing between the slow and fast  
 166 blocks (even before the start of the trial, as shown in Extended Data Figure 3). The fourth PC (9.74%)  
 167 reflects the time-dependent aspect of urgency until just before movement onset. The remaining  
 168 components are similar to PCs 2 and 4 during deliberation, but capture some of the heterogeneity  
 169 across cell activity patterns after commitment and movement onset. We discuss these higher PCs in  
 170 the Supplemental Materials.

171 PC2 warrants special attention. Note that until the moment of commitment, it correlates very well  
 172 with the evidence provided by the token movements (compare to Figure 1c). Indeed, as shown in  
 173 Extended Data Figure 4, the correlation between the time-delayed evidence and the value of PC2 is  
 174 highly significant ( $p < 10^{-100}$ ) with a correlation coefficient of  $R = 0.92$ . This is notable because the PCA  
 175 algorithm was not given any information about these different trial types (easy, ambiguous,  
 176 misleading, etc.) but was simply given data averaged across four large trial groups that only  
 177 distinguished left versus right choices and slow versus fast blocks. Nevertheless, when the resulting

178 temporal profiles of PC2 are calculated for specific trial types they clearly reflect how the evidence  
179 dynamically changes over the course of deliberation in those trials.

180 Could this finding be a trivial consequence of overall cell tuning? To test this possibility, we used the  
181 Tensor Maximum Entropy method of Elsayed & Cunningham<sup>84</sup> to generate synthetic data sets that  
182 retain primary features such as tuning, but are otherwise random (see Methods). As shown in  
183 Extended Data Figure 4c, when PCA is applied to such synthetic data sets it does not produce  
184 components that are as well correlated with evidence as PC2 from our true data ( $p < 0.01$ ). The  
185 implication is that the emergence of PC2 in the real neural data requires a consistent relationship  
186 between how cells reflect the final choice (left vs. right) and how they reflect the evidence that leads  
187 to that choice during deliberation (easy vs. ambiguous vs. misleading, etc.).

188 Figure 3 shows the trajectories of the different trial types, separately for the Slow and Fast blocks,  
189 plotted in the space of PCs 1, 2, and 4. While a quantitative comparison between the Slow and Fast  
190 blocks is made difficult because a slightly different subset of cells is included in each (see Methods),  
191 the qualitative shape of the trajectories is very similar. As indicated in Figure 3a (dotted black  
192 arrows), in both block types the neural activity evolves in a clockwise manner in the space of PC1 and

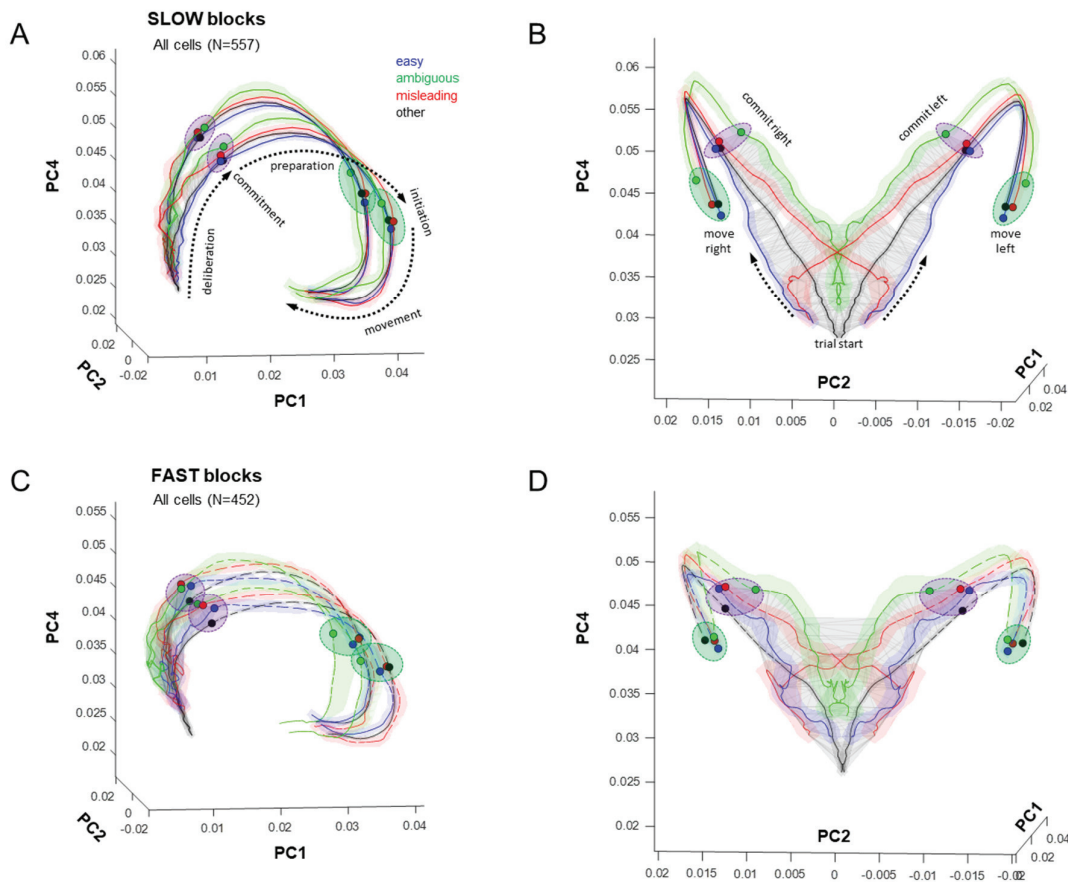

Figure 3. Neural trajectories in the space of PCs 1, 2 and 4, averaged across easy, ambiguous, and misleading trials as well as the other (unclassified) trials. Panels A and B show two views of data from Slow blocks, and panels C and D show the same views of data from the Fast blocks. Shaded colored regions around each trajectory indicate the 95% confidence interval. Dotted arrows in A indicate how the state of activity evolves over time. The gray wireframe encloses all states visited during the deliberation epoch, across all trial types. Purple ellipses indicate the region in which commitment occurs (indicated for individual trial types by small colored circles) and green ellipses indicate the point at which movement is initiated. For clarity, the neural state after movement initiation is only shown in panels A and C.

193 PC4, passing over a region of deliberation until reaching a commitment state (purple ellipses),  
194 whereupon it rapidly moves to a movement-specific initiation subspace (green ellipses), and then  
195 turns back toward the starting point during movement execution. Some of these phenomena have  
196 previously been reported using neural space analyses of preparatory and movement-related activity in  
197 cortical regions during instructed reaching tasks with a single target<sup>76–79,85–87</sup>. Here, our task allows us  
198 to examine in more detail what happens during the process of prolonged deliberation when subjects  
199 are selecting among multiple targets.

200 In each panel of Figure 3, we’ve drawn a gray wireframe around all of the points from the beginning  
201 of the trial until commitment time (280ms before movement onset), across all trial types, thus defining  
202 the subspace within which deliberation occurs. This subspace resembles a triangular surface that is  
203 extended mostly in PC2 and PC4 and curved slightly into PC1. It is quite thin – for example, in the  
204 slow block the value of  $\Psi$  (see Methods) is 0.204, which is roughly equivalent to a triangular sheet  
205 whose thickness is  $1/57^{\text{th}}$  of the length of each side. We call this the “decision manifold”.

206 The flow of neural states upon the decision manifold is quite orderly, proceeding from bottom to top  
207 as time elapses and shifting left and right with the sensory evidence. For example, consider the  
208 misleading trials, in red, which clearly reveal the switch in sensory evidence. In effect, the flow of the  
209 neural state during deliberation resembles the temporal profile of evidence (Figure 1c) mapped onto  
210 that curved wireframe surface. The neural state continues to flow along the decision manifold until it  
211 reaches one of two edges (purple ellipses) at the time of commitment, and then turns into PC1 and  
212 accelerates to rapidly flow along one of two paths, each corresponding to the choice taken, until  
213 movement initiation (green ellipses).

#### 214 Region-specific dynamics

215 While the structure of the neural space computed across all neurons is interesting, it is still more  
216 informative to compare that structure across the different brain regions in which we recorded. Because  
217 the loading matrix produced by PCA provides coefficients that map each individual neuron’s  
218 contribution to each PC, we can “project” the activity of any subset of neurons into the space of these  
219 same PCs (see Extended Data Figure 5), and then plot region-specific neural space trajectories. Figure  
220 4a shows this for the dorsal premotor cortex, where we see a structure that is quite similar to what was  
221 shown for all neurons (not surprisingly since the PMd population is the largest). As before, we see a  
222 triangular decision manifold that is relatively thin ( $\Psi=0.343$ ) and extends along PC2 and PC4.  
223 However, note that it initially strongly leans in the negative PC1 direction and then curves around just  
224 before commitment (see the side view shown in Figure 4a, right). Interestingly, the PMd decision  
225 manifold is curved as if it lies on the surface of a sphere (see inset, spherical fit  $R^2 = 0.65$ ), a point to  
226 which we will return below.

227 In contrast, the decision manifold of primary motor cortex (M1, Figure 4b) is remarkably flat and thin  
228 ( $\Psi=0.252$ ) and leans into the positive PC1 direction. Nevertheless, the evolution of the neural state  
229 along the surface of the decision manifold in both regions obeys the same pattern seen in Figure 3,  
230 proceeding from bottom to top as time elapses and shifting left and right with the sensory evidence,  
231 always lying within the same subspace (curved for PMd, planar for M1). Note that Figure 4 shows  
232 data aligned on movement onset, as in previous figures, but also superimposes neural space  
233 trajectories computed on the basis of data aligned on the start of the trial (see Extended Data Figure 3)  
234 and then projected into the same PC space using the same loading matrix. As is clear from the figures,  
235 regardless of how the trajectories are computed, they always fall within the same decision manifold in  
236 PC space, for both PMd and M1.

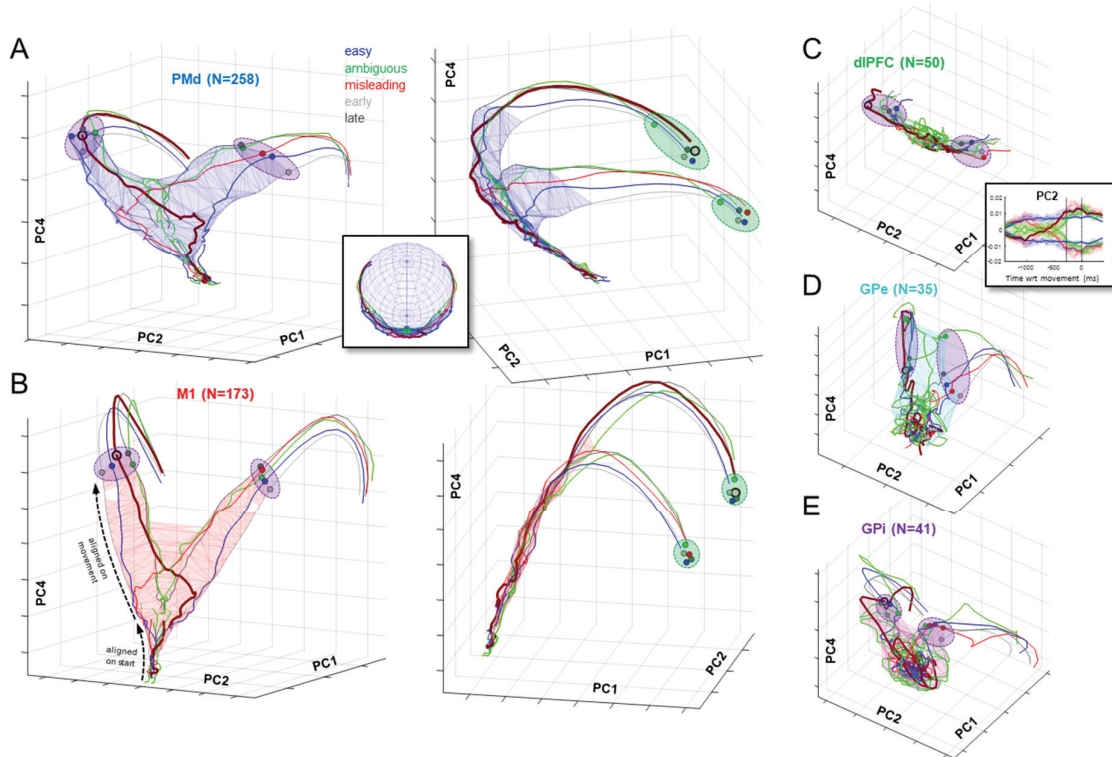

Figure 4. Neural trajectories in the space of PCs 1, 2 and 4, plotted using activity during Slow blocks, separately for PMd (A), M1 (B), dlPFC (C), GPe (D) and GPi (E). Separate trajectories are plotted for easy, ambiguous, and misleading trials, as well as all trials in which decisions were shorter than 1400ms (early) and in which decisions were longer than 1400ms (late). For clarity, confidence intervals have been omitted. As in Figure 3, trajectories are computed from data aligned on movement onset, and extend from 1400ms prior. Blue (PMd) and red (M1) wireframes enclose all states before commitment (280ms before movement). Here, we also superimpose trajectories computed from data aligned on the start of the trial and until 500ms later (projected through the same loading matrix). Dashed black arrows in panel B, left, indicate where these separate trajectories can be seen in the M1 space. In all panels, the trajectory of misleading trials in which the monkey correctly chose the right target is highlighted with a thicker line. Purple ellipses emphasize the time of commitment and green ellipses emphasize movement onset. The inset in A shows how PMd activity tends to remain on the surface of a sphere, particularly during deliberation. The inset in C shows PC2 computed from the dlPFC population for easy (blue), ambiguous (green), and misleading trials (red).

237 It is noteworthy that in both PMd and M1, the state reached at the moment of commitment (purple  
 238 ellipses in Figure 4a,b) shows an orderly relationships with the reaction time in each trial type  
 239 (shortest in “early” trials, and longest in “late” trials). This is in agreement with the observation that  
 240 even at a single trial level, a consistent relationship between neural state and reaction time can be  
 241 observed during a simple instructed reach task<sup>76</sup>. Furthermore, in M1 the trajectories after that point  
 242 converge to arrive in a relatively compact subspace (green ellipses) at movement onset – what  
 243 Churchland et al.<sup>88</sup> called an “optimal subspace”.

244 In contrast to PMd and M1, the deliberation manifold in dorsolateral prefrontal cortex (dlPFC, Figure  
 245 4c) is almost exclusively extended along PC2 ( $\Psi=0.564$ , like a cylinder whose length is 22 times its  
 246 radius). Like PMd and M1, the neural state along PC2 shifts left and right with sensory evidence (see  
 247 inset), but after commitment it exhibits only a small excursion into PC1. This suggests that neural  
 248 activity in dlPFC primarily reflects the sensory evidence used to make decisions in the task, consistent  
 249 with many previous studies<sup>89–96</sup>.



250 A strong contrast to the cortical data is seen when we examine the neural state of cells recorded in the  
251 globus pallidus (GPe and GPi). In both regions, the neural state during deliberation is confined within  
252 a subspace that is not a thin manifold but instead resembles a ball compressed along PC2 and  
253 extended along PC4 (Figure 4d,e). During deliberation, activity in these regions does not evolve in an  
254 orderly fashion as seen in cortex. This could be partly due to the lower number of cells recorded in  
255 GPe and GPi as compared to PMd and M1, although similar results hold when we restrict *all* regions  
256 to 35 cells (Extended Data Figure 6a). Nevertheless, by the time commitment occurs, the state of both  
257 GPe and GPi lies in a choice-specific subspace (purple ellipses) and then evolves quickly to a  
258 corresponding initiation subspace. These findings are consistent with our previous report of GPe/GPi  
259 activity in the tokens task, in which we suggested that these regions do not determine the choice but  
260 rather contribute to the process of commitment<sup>44</sup>.

## 261 Interpreting the shape of decision manifolds

262 As shown in Figure 4, the decision manifolds computed from PMd and M1 possess distinct shapes.  
263 While M1 is almost completely flat, the PMd manifold is curved, as if lying on a surface of a sphere.  
264 Do these shapes reveal differences in the neural dynamics in these regions? To address this question,  
265 we consider the shape of the PMd decision manifold in terms of two separate phenomena: its  
266 curvature in the PC1-PC4 plane (Figure 4a, right), and its curvature in the PC1-PC2 plane (inset in  
267 Figure 4a).

268 First, we consider why the PMd manifold initially leans in the negative PC1 direction and then bends  
269 toward the positive PC1 direction prior to commitment (its curvature in the PC1-PC4 plane). One  
270 potential explanation suggests that an inhibitory influence prevents premature movement before  
271 selection is complete<sup>97</sup> by keeping PMd away from commitment, but it is gradually overcome by  
272 positive feedback in the recurrent circuit between PMd and GPi<sup>44,59,98</sup>. According to this hypothesis, as  
273 the cortical activity becomes increasingly biased in favor of one target over another, it gradually  
274 begins to produce the emergence of choice selectivity in the GPe, about 200ms before commitment  
275 (see Extended Data Figure 2b, row 3). When that becomes strong enough to engage selectivity in the  
276 GPi, it in turn strengthens emerging selectivity in the thalamus, which then further strengthens  
277 selectivity in the cortex. Thus, a positive feedback is established leading to a winner-take-all process  
278 that overcomes inhibition and constitutes volitional commitment. This hypothesis predicts a  
279 relationship between how tuning emerges in GPi and how and when the PMd state begins to flow  
280 toward commitment.

281 To test this prediction, we examined the correlation between the flow toward commitment in PMd (as  
282 reflected in the rate of change of PC1 during deliberation) with the depth of directional selectivity in  
283 GPi (as reflected in the absolute value of PC2). Figure 5a shows this comparison for 6 large trial  
284 groups: all rightward choices in Slow and Fast blocks, early rightward choices in Slow and Fast  
285 blocks, and late rightward choices in Slow and Fast blocks (see Methods for trial definitions).  
286 Leftward decision trials were not considered because they are symmetric with rightward decision  
287 trials and thus redundant. As can be seen for the different trial types, except for a constant scaling  
288 factor the match between these two very different variables is strong, particularly in the epoch  
289 between commitment and movement onset. Even if the data is restricted to the period *before*  
290 commitment, the correlation for each trial group shown in the individual panels of Figure 5a is  
291 significant at  $p < 10^{-10}$  with Pearson's R above 0.86, and for all trials together with  $R = 0.84$  (Figure 5b).  
292 Furthermore, across these six conditions there was a significant correlation ( $p = 0.0029$ ,  $R = 0.9556$ )  
293 between the time when the PMd manifold began to tilt toward commitment (derivative of PC1  
294 became consistently positive) and the time when tuning became significant in GPi (95% CI of PC2 no  
295 longer included 0). Similar results were not obtained when comparing GPi PC2 against the derivative  
296 of PC1 computed from other regions (although there was a weaker but significant correlation with the  
297 derivative of PC1 in M1). It is important to note that this particular prediction – a relationship  
298 between the derivative of one component in PMd and the absolute value of another in GPi – is not



299 arbitrary. It is motivated by the specific proposal that the timing of the bend in the PMd decision  
 300 manifold in the PC1-PC4 plane (Figure 4a, right) is related to the timing of how tuning emerges in the  
 301 basal ganglia, which is itself motivated by the hypothesis that both of these variables reflect positive  
 302 feedback in a recurrent attractor circuit. Of course, like any correlation analysis, it cannot conclusively  
 303 prove a specific causal relationship. An alternative, though not mutually exclusive hypothesis is that  
 304 both of these regions are influenced by a common source of inhibition that is gradually released as  
 305 commitment approaches.

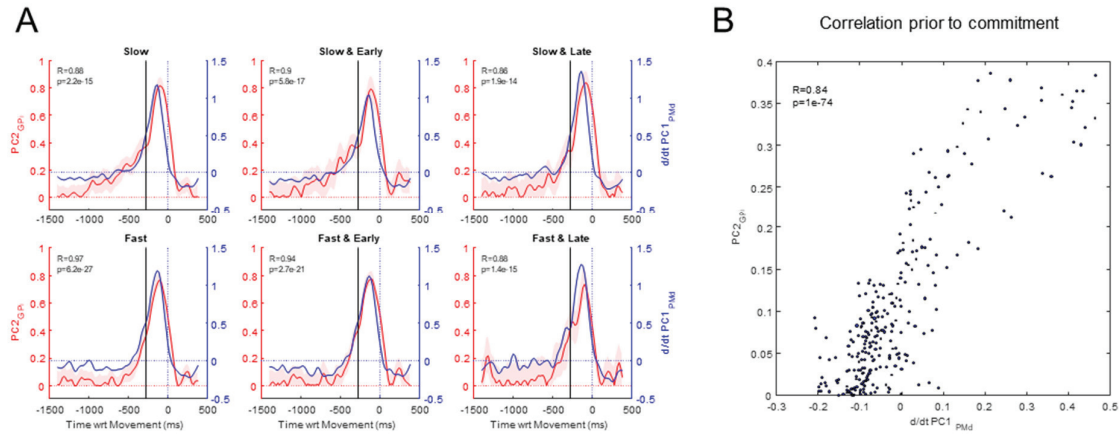

Figure 5. Comparison of selectivity in GPi with the slope of the PMd decision manifold. **A.** Comparison within six conditions: all Slow block trials, Slow block trials where  $DT < 1400$ , Slow block trials where  $DT > 1400$ , all Fast block trials, Fast block trials where  $DT < 950$ , Fast block trials where  $DT > 950$ . Each panel plots the absolute value of PC2 computed from GPi (red, left y-axis, shaded region indicates 95% CI) along with the derivative of PC1 computed from PMd (blue, right y-axis). The black vertical line indicates the estimated time of commitment. At the top left corner are Pearson's  $R$  and the  $p$ -value of the correlation between these two signals from 1000ms to 280s before movement. **B.** The correlation of these signals, from 1000 to 280ms before movement onset, across all 6 conditions.

306 In addition to its curvature in the PC1-PC4 plane, the PMd manifold is also curved in the PC1-PC2  
 307 plane, as if it lies upon a surface of a sphere (see inset in Figure 4a). This is strikingly different than  
 308 the M1 manifold, which is nearly perfectly flat (compare Figure 4a with b). What could explain this  
 309 difference in shapes?

310 Here, we consider one possible explanation related to the dynamics of recurrent attractor networks.  
 311 We illustrate this using a very simple system consisting of two neurons that compete against each  
 312 other through recurrent inhibition. Note that this minimal model is not intended to simulate our data,  
 313 but simply to demonstrate the possibility that some features of our data (e.g. shape of the decision  
 314 manifold) could be the result of very general properties of recurrent non-linear dynamical systems.

315 Let's consider two neurons whose activity is denoted as  $x_1$  and  $x_2$  (Figure 6a) and governed by the  
 316 following differential equation<sup>23</sup>

$$317 \quad \frac{dx_i}{dt} = (1 - x_i)(E_i + U + f(x_i)) - x_i(A + f(x_j)) \quad (1)$$

318 On the right-hand side of equation (1), the first term is excitation and the second is inhibition.  $E_i$  is the  
 319 input evidence for choice  $i$ ,  $U$  is the urgency signal,  $A$  is a passive decay rate,  $f(x_i)$  is the recurrent  
 320 excitation of each cell to itself, and  $f(x_j)$  is the recurrent inhibition from the other cell,  $j$ . Note that  
 321 equation (1) ensures that cell activities are always in the interval from 0 to 1. The function  $f(x)$  is  
 322 sigmoidal of the form

$$323 \quad f(x) = \frac{G}{1 + e^{-S(x-0.7)}} \quad (2)$$

324 where  $G$  is the gain and  $S$  is the steepness of the sigmoid. Figure 6 schematizes this simple model and  
 325 illustrates some of its dynamics.

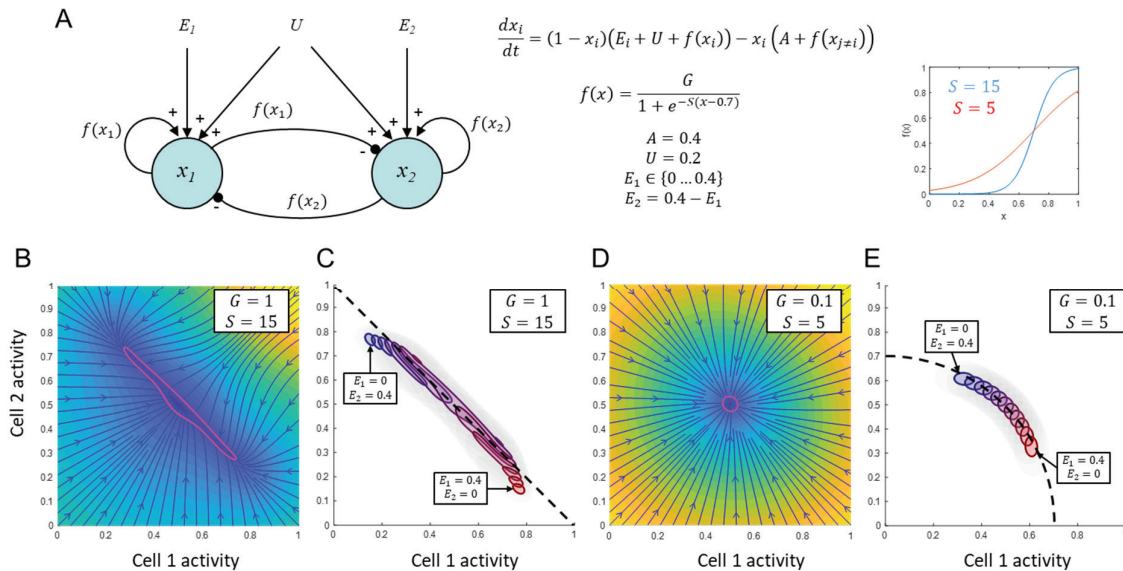

Figure 6. Simulation of a simple 2-neuron recurrent competitive attractor. **A**. The structure of the model is shown at left, next to the governing equations and parameter settings. Two forms of the interaction function  $f(x)$  are shown in the inset at right. **B**. The flow field for a system with high gain ( $G=1$ ) and steep slope ( $S=15$ ) when the input evidence is balanced such that  $E_1=E_2=0.2$ . Blue arrows depict the flow and shading indicates the speed (yellow=fastest, dark blue=slowest). The purple outline indicates a region around the stable equilibrium, in which the state will tend to remain even with substantial noise. Note that the dynamics flow quickly toward that region and then move more slowly within it. **C**. The stable regions of the same system for several input patterns, ranging from strong evidence in favor of choice 2 (top left, blue) to strong evidence in favor of choice 1 (bottom right, red). Note that these align in what is approximately a straight line across the state space (compare to dashed black line). **D**. Same as **B** but for a system in which the interaction function has low gain ( $G=0.1$ ) and a shallow slope ( $S=5$ ). **E**. Stable regions of the system in **D**. Note that now, the stable regions for the same range of input patterns do not form a straight line but rather fall on a curve roughly equivalent to a circle (dashed black curve).

326 Figure 6b shows the flow field of the system in the  $(x_1, x_2)$ -plane assuming a function  $f(x)$  with high  
 327 gain and a steep slope, when the evidence is balanced. Note how the flow field quickly pushes the  
 328 neural state to a central stable region, outlined in purple, within which the flow is slower. In the  
 329 presence of noise, the system will be strongly constrained to remain inside this region, but can shift  
 330 within it relatively easily. As the balance of evidence changes, the stable region shifts in the plane  
 331 (Figure 6c) but always lies oriented along that straight line. As a result, activity is normalized such  
 332 that  $x_1+x_2$  is approximately constant (L1-normalization). In contrast, Figure 6d,e shows a system  
 333 where the interaction function has low gain and a shallow slope. Note that the stable region for  
 334 different input patterns still shifts in the  $(x_1, x_2)$ -plane, but not along a straight line (panel e). Instead,  
 335 the different stable regions now lie along a circular path, such that  $x_1^2 + x_2^2$  is approximately constant  
 336 (L2-normalization). In both systems, the state is strongly confined into a narrow subregion of the full  
 337 space (a “decision manifold”), but can shift within it due to changes of evidence as well as noise. If  
 338 the value of  $U$  is increased, this subspace will shift toward the upper right (not shown) until the  
 339 system bifurcates into two stable attractors, each corresponding to choosing either  $x_1$  or  $x_2$ .

340 This simple model proposes a straightforward candidate explanation for the difference in shapes of  
 341 the decision manifolds in PMd versus M1 (Figure 4a,b). To summarize, relatively gentle competitive  
 342 dynamics between candidate options can produce a curved quasi-spherical manifold, as seen in PMd,

343 while strong and steep winner-take-all dynamics can produce a flat one, as seen in M1. This may  
344 imply that PMd tolerates multiple competing potential actions more readily than does M1, a  
345 conjecture made in previous modeling work<sup>25</sup>. However, at present these are just conjectures. A more  
346 complete analysis would require a more sophisticated model, in which different neural populations are  
347 dynamically coupled and interact in more complex ways. It is possible that in such a model, other  
348 parameter settings and other features of dynamics may better explain the shapes of decision  
349 manifolds, but exploring those possibilities is beyond the scope of the present paper.

## 350 Analyses of the loading matrix

351 Another approach for inferring the putative functional contributions of different brain regions is to  
352 examine the distribution of the loading coefficients for cells in each region. For example, if a given  
353 population of cells is strongly related to the sensory evidence provided by token jumps, then cells in  
354 that population should tend to have higher loading onto PC2 than cells from another population that is  
355 less sensitive to evidence. As described in Methods, we characterized the distribution of loading  
356 coefficients for the first 11 PCs (which capture 95% of variance) by fitting the 11-dimensional space  
357 of points for each brain region with gaussian mixture models (GMMs). The results are shown in  
358 Figure 7.

359 The distribution of loading coefficients for cells in PMd (Figure 7a) was highly distributed but not  
360 without structure, and was best fit with two gaussians. The first (1: 68% contribution to the fit) was  
361 dominated by cells only weakly contributing to PCs 1, 2, and 4, but strongly to PC3. The second (2:  
362 32%) included cells that strongly contributed to PCs 1 and 2 but more weakly to PCs 3 and 4. The  
363 distribution for M1 was also best fit with two gaussians, one (1: 56%) contributing mostly to PC3 and  
364 another (2: 44%) contributing to 1, 2, and 4 but not 3. Thus, in both PMd and M1, there was a trend  
365 for cells that most strongly reflect the animal's speed-accuracy trade-off (PC3) to be less strongly  
366 tuned to direction (PC2), and vice-versa (Figure 7a,c, middle panels).

367 In contrast, populations in dIPFC, GPe, and GPi were well fit with a single gaussian (Figure 7e,f),  
368 though perhaps more structure would have been seen with larger populations. Importantly, there were  
369 significant and potentially functionally relevant differences between these regions. In particular, the  
370 distribution of loadings from dIPFC and GPi were nearly orthogonal in the space of PCs 1, 2, and 4  
371 (Figure 7f). The dIPFC was extended along PC2 and not along the other components, consistent with  
372 the proposal that it primarily carries information on the sensory evidence provided by token  
373 movements. In contrast, GPi was relatively narrow in PC2 and instead extended along PCs 3 and 4,  
374 related to the block and time-dependent aspects of urgency. Furthermore, there was a significant  
375 negative correlation ( $R=-0.32$ ,  $p<0.001$ ) between GPi loadings on PC1 versus PC4 (Figure 7e, right  
376 panel, purple). In other words, cells that build-up over time (positive on PC4) tend to reduce their  
377 activity after commitment (negative on PC1), while cells that decrease over time (negative on PC4)  
378 tend to increase after commitment (positive on PC1).

379 In summary, our analyses of loading matrices suggest that while different regions do appear to  
380 contribute to different subsets of PCs (e.g. the orthogonal relationship of dIPFC and GPi in Figure 7f),  
381 the population within each region does not contain distinct clusters. In other words, while there is  
382 some structure in the loading matrix (e.g. Figure 7a,b, middle panel), the distributions of properties  
383 within each region are continuous.

384 Could that continuity of properties be an artifact resulting from dimensionality reduction? That is, if  
385 distinct categories of cells with different functional roles really did exist, would our analyses be able  
386 to identify them? To address this question, we created a variety of synthetic populations of neuron-  
387 like units and applied to them the same analyses we used to examine real data, including PCA and  
388 GMM analyses of the resulting loading matrix. As described in the Supplemental Materials (see  
389 Extended Data Figure 8), this yielded three conclusions: It confirmed that PCA does correctly identify

390 all of the components from which our synthetic neural populations were constructed. However, it also  
 391 showed that some of the higher-order components (like PC5 in Figure 2) can result from PCA  
 392 “cancelling out” some of the firing patterns already captured by lower-order components (e.g. PC2),  
 393 in order to explain things like neurons tuned only during movement. Nevertheless, in all cases the  
 394 GMM analysis of the loading matrix correctly identified any real categories of neurons in the  
 395 population. This suggests that the lack of distinct clusters we found in our data indeed reflects the  
 396 absence of separate categories in the real neural populations.

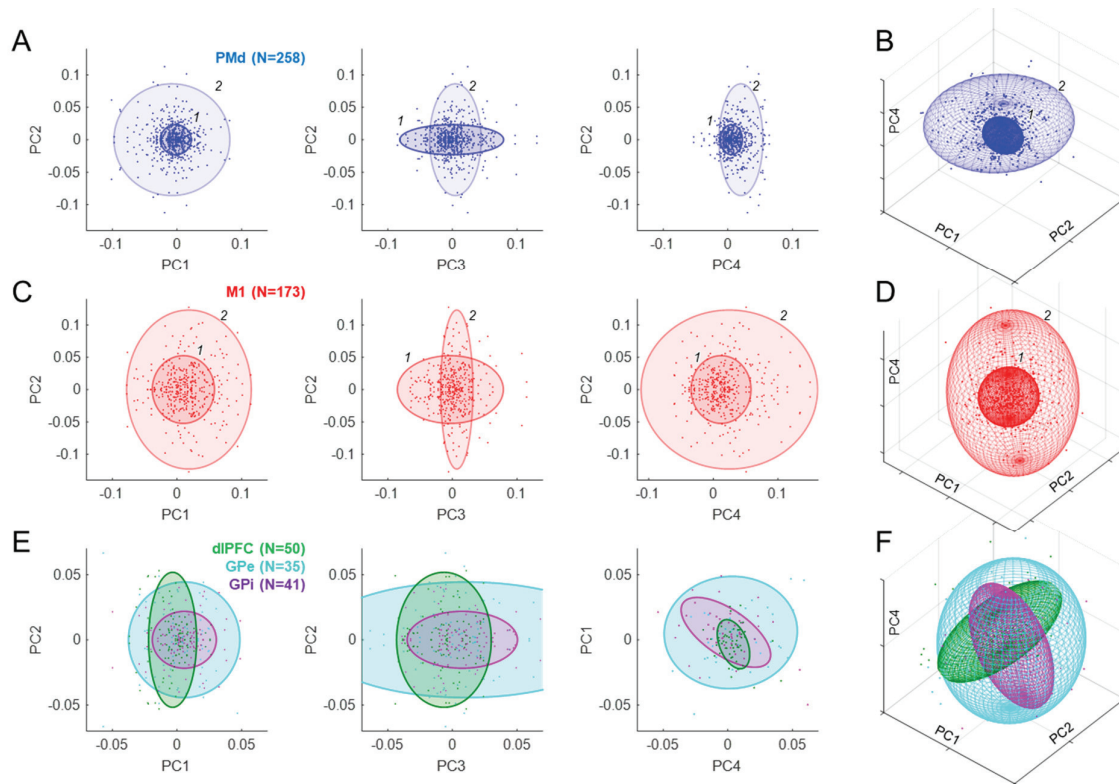

Figure 7. Analysis of loading coefficients. **A.** Each point indicates the weight of the contribution of a given PMd cell to the principal component indicated on the axes. Colored ellipses indicate the centroid and 3 times standard deviation of each of the two Gaussians (labeled 1 and 2) that provided the best fit to the distribution of these populations. **B.** The same PMd Gaussians in the 3-d space of PC1, PC2, and PC4. **C.** Same as A for M1. **D.** Same as B for M1. **E.** Same as A for cell populations in dlPFC (green), GPe (cyan), and GPi (purple), each of which was best fit with a single Gaussian. Note that unlike A and C, here the right panel shows PC4 vs PC1. **F.** Same as B for dlPFC, GPe, and GPi.

## 397 Discussion

398 Many neurophysiological studies have suggested that decisions between actions unfold within the  
 399 same sensorimotor regions responsible for the control of those actions<sup>1,99–101</sup>. This includes FEF and  
 400 LIP for gaze choices<sup>6,91,102–105</sup> and PMd and MIP for reaching choices<sup>7,36,105–107</sup>. Several computational  
 401 models of the decision mechanism suggest that it behaves like a “recurrent attractor system”<sup>23–28</sup>,  
 402 where reciprocally competing groups of neurons tuned for the available choices compete against each  
 403 other until one group wins and the system falls into an attractor corresponding to a specific choice.

404 The results reported here provide strong support for this class of models. In particular, the cells we  
 405 recorded in PMd and M1 do not appear to belong to separate categories related to decision-making  
 406 versus movement preparation or execution, but instead behave like part of a unified dynamical system  
 407 that implements a biased competition and transitions to commit to a choice through a winner-take-all  
 408 process. During deliberation, the pattern of cell activity in these regions is confined to a highly



409 constrained subspace in the shape of a thin manifold, and is shifted around within that manifold by the  
410 decision variables pertinent to the task (here, the sensory evidence and the rising urgency). When  
411 commitment occurs, the same group of cells now transitions from the decision manifold to a roughly  
412 orthogonal tube-shaped subspace corresponding to a specific choice<sup>81</sup> and quickly flows to a subspace  
413 related to movement initiation<sup>77,88</sup>. This is precisely the kind of “winner-take-all” phase transition that  
414 occurs in recurrent attractor models.

415 Additional insights can be obtained by examining the low-dimensional components produced by  
416 dimensionality reduction. In particular, it is noteworthy that during deliberation, the four strongest  
417 components of neural activity (which together account for just over 80% of the variance) capture the  
418 key elements of the urgency-gating model<sup>14</sup>: The momentary evidence (in PC2), the urgency signal (a  
419 context-dependent baseline in PC3 and time-dependent ramping in PC4), and the transition to  
420 commitment (PC1). Perhaps even more important is how these components are differently expressed  
421 in the different cell populations. In particular, the neural state in dlPFC varies almost entirely along  
422 PC2 while, conversely, the state in GPe/GPi during deliberation is primarily determined by PC3 and  
423 PC4, and not at all by PC2. This suggests that information about sensory evidence is provided by  
424 prefrontal cortex<sup>89–96</sup> while the urgency signal is coming from the basal ganglia<sup>44,108,109</sup>.

425 The presence of the evidence-related component PC2 in the cortical data is particularly remarkable  
426 because the dimensionality reduction algorithm was not provided with any information about the  
427 variety of trial types (easy, ambiguous, etc.) but was merely given data averaged across four very  
428 large groups of trials: left or right choices during slow or fast blocks. Nevertheless, the difference of  
429 activity related to left vs. right choices led the algorithm to assign a choice-related component that  
430 also happens to capture the evolving evidence for that choice. A neural population control method<sup>84</sup>  
431 verified that this is not a simple consequence of tuning. Additional analyses (Extended Data Figure  
432 6b) show that a unified evidence/choice component is obtained even if the PCA algorithm is only  
433 given data restricted to activity *after* movement onset. This suggests consistency between cell  
434 properties before versus after movement onset<sup>54</sup>, and argues against a categorical distinction between  
435 movement selection vs. execution circuits and in favor of a unified dynamical system, at least among  
436 the cells we recorded.

437 The emergence of the other components is also highly robust. If the PCA algorithm is only given data  
438 from the slow block, PC3 is lost (unsurprisingly), but the other components remain (Extended Data  
439 Figure 6c). Also not surprisingly, if we provide PCA with data from all 28 of our trial classes, the  
440 components are even more clearly distinguished, even though the number of cells that possess all of  
441 the required trials is reduced by 37% (Extended Data Figure 6d). In fact, any reasonable subset of data  
442 we have tried leads the PCA algorithm to identify the same functionally relevant components, albeit  
443 sometimes in a slightly different order depending on how much variance is captured by each. Finally,  
444 similar features are obtained if we leave out the cell duplication step (see Methods), although the  
445 resulting decision manifolds become asymmetrically distorted and some of the structure of loading  
446 matrices is more difficult to see (Extended Data Figure 7).

447 Finally, it is noteworthy that many of our findings reliably reproduce previous observations from very  
448 different tasks, including ones in which monkeys did not have to make any decision and were simply  
449 instructed to reach out to a single target. This includes the general flow of the neural state from target  
450 presentation to movement onset and offset<sup>77</sup> (Figure 3a,c), the orderly relationship between reaction  
451 times and the neural state in PMd/M1<sup>76</sup> (Figure 4a,b, purple ellipses), the compact subspace in M1 at  
452 movement onset<sup>88</sup> (Figure 4a,b, green ellipses), and the presence of condition-independent  
453 components related to state transitions and elapsing time<sup>79</sup> (Figure 2, PC1, PC4). Although most of  
454 our data comes from a prolonged period of deliberation that is not present in those other studies, the  
455 phenomena related to preparation and execution, which are shared between paradigms, are  
456 nevertheless robustly reproduced. This further strengthens the proposal that action selection and  
457 sensorimotor control are two modes of a single unified dynamical system.



458 Indeed, analyses of the loading matrix suggest that among the cells we recorded in PMd and M1, there  
459 is no categorical distinction between those involved in selection and those responsible for movement.  
460 Further analyses of synthetic populations (e.g. Extended Data Figure 8c) demonstrate that some of the  
461 higher order PCs we observed (PC5 and PC6, see Figure 2) may result from the heterogeneity of  
462 properties across our cell population, which includes purely decision-related and purely movement-  
463 related cells. However, analysis of the loading matrix concluded that these properties are not clustered  
464 into distinct categories as in synthetic data (Extended Data Figure 8d), but are instead distributed  
465 along a continuum (Figure 7).

466 While some of these findings could have been anticipated from analyses of individual cells, one  
467 important observation that would not have been possible concerns the shape of the decision subspace  
468 in the cortical populations. In particular, it is highly consistent across all of the different trial types and  
469 always resembles a thin manifold. This suggests strong normalization dynamics that are an inherent  
470 feature of recurrent attractor models. That is, the state of neural activity is pushed to lie on a surface  
471 that conserves some quantity (e.g. total neural activity with respect to some baseline) but is then free  
472 to move upon that surface under the influence of evidence, urgency, or simply noise. Furthermore, the  
473 particular shape of the manifold reveals consistent differences in the dynamics of different neural  
474 populations. In particular, regardless of what data we provide to PCA, the M1 manifold is always  
475 almost perfectly flat while the PMd manifold always exhibits a characteristic curvature. Interestingly,  
476 a very similar curvature was observed in preliminary analyses of PMd data in a very different decision  
477 task<sup>110</sup>. In contrast, the decision subspaces in the globus pallidus are much more compact and nothing  
478 like the thin manifolds in cortex.

479 We believe that the shape of the decision manifolds computed from different regions reveals  
480 properties of the underlying dynamics of neural activity in those regions. The planar manifold seen in  
481 M1 would be expected from a dynamical system with a steep interaction function governing mutual  
482 inhibition between competing groups of neurons (Figure 6c). In contrast, the curved PMd manifold  
483 would be expected from a system with a shallower interaction function (Figure 6e). In addition, we  
484 observed that the PMd manifold bends, approximately 200ms prior to commitment, along the  
485 component associated with the transition from deciding to acting. We suggest that this bend is the  
486 signature of a gradually emerging positive feedback in the cortico-striatal-thalamo-cortical circuit,  
487 which gradually overcomes inhibitory signals preventing premature selection<sup>97</sup>. Indeed, the analysis  
488 shown in Figure 5 reveals a strong correlation between how directional selectivity begins to emerge in  
489 GPi and how the PMd state begins to flow toward commitment, consistent with positive feedback  
490 between these regions<sup>59,98,111</sup>. Of course, establishing a causal relationship will require future studies,  
491 including simultaneous microstimulation in one region and recording in the other.

492 In conclusion, our analyses support the hypothesis that decisions between actions emerge as a  
493 competition within the sensorimotor system<sup>7,9,25,91,102,104,105</sup>, which is governed by recurrent attractor  
494 dynamics<sup>23,24,26–28</sup>. That competition is biased by sensory information coming at least in part from the  
495 prefrontal cortex<sup>91</sup> and is gradually amplified by an urgency signal from the basal ganglia<sup>44,108,109</sup>.  
496 Commitment to a choice occurs through a positive feedback between premotor cortex and the basal  
497 ganglia<sup>44,59,98,111</sup>, leading to a winner-take-all process. That process then brings the cortical system to a  
498 state suitable for initiating the selected action<sup>88,112</sup>, setting into motion the “first cog” of a dynamical  
499 machine that controls our actions in the world<sup>29–31</sup>.

## 500 Acknowledgements

501 This work was supported by Canadian Institutes of Health Research grants MOP-102662 and PJT-  
502 166014, the Canadian Foundation for Innovation, Fonds de Recherche en Santé du Québec, the EJLB  
503 Foundation to PC, and fellowships from the FYSSEN Foundation and the Groupe de Recherche sur le  
504 Système Nerveux Central to DT. The authors wish to thank Terrence Sanger for valuable observations  
505 about our data, and John Kalaska and Andrea Green for additional observations and helpful comments

506 on the manuscript. PC and DT designed the study, DT collected the data; DT, JFC, AF, and PC  
507 analyzed the data; DT and PC wrote the manuscript; all authors approved the final version.

508 The data that support the findings of this study are available from the corresponding author upon  
509 reasonable request.

## 510 Methods

### 511 Subjects and apparatus

512 Neural recordings were performed in two male rhesus monkeys (*Macaca mulatta*; *monkey S*: 4-9  
513 years old, 5-9kg; *monkey Z*: 4-6 years old, 4-7kg). Animals were implanted, under anesthesia and  
514 aseptic conditions, with a titanium head fixation post and recording chambers. The University of  
515 Montreal animal ethics committee approved surgery, testing procedure and animal care.

516 Monkeys sat head-fixed in a custom primate chair and performed two planar reaching tasks using a  
517 vertically oriented cordless stylus whose position was recorded by a digitizing tablet (*CalComp*,  
518 125Hz). Their non-acting hand was restrained on an arm rest with Velcro bands. In most sessions,  
519 unconstrained eye movements were recorded using an infrared camera (*ASL*, 120Hz). Stimuli and  
520 continuous cursor feedback were projected onto a mirror suspended between the monkey's gaze and  
521 the tablet, creating the illusion that they are in the plane of the tablet. Neural activity was recorded  
522 from the hemisphere contralateral to the acting hand with tungsten microelectrodes (1.0 – 1.5 M $\Omega$ ,  
523 *Frederic Haer* and *Alpha-Omega Eng.*) moved with a computer-controlled microdrive (*NAN*  
524 *Instruments*) and electrophysiological signals were acquired with the AlphaLab system (*Alpha-Omega*  
525 *Eng.*). Spikes were sorted offline using Plexon Offline Sorter (*Plexon Inc.*). Electrodes were targeted  
526 based on 3D reconstructions (Brainsight, Rogue Research) using structural MRI images (Siemens 3.0  
527 T). Behavioral data were collected with the software used to display the task (LabView, *National*  
528 *Instruments*).

### 529 Behavioral task and classification of trial types

530 Monkeys were trained to perform the “tokens” task (Figure 1a) in which they are presented with one  
531 central starting circle (1.75cm radius) and two peripheral target circles (1.75cm radius, arranged at  
532 180° around a 5cm radius circle). The monkey begins each trial by placing a handle in the central  
533 circle, in which 15 small tokens are randomly arranged. The tokens then begin to jump, one-by-one  
534 every 200ms (“pre-decision interval”), from the center to one of the two peripheral targets always  
535 oriented at 180° to each other with respect to the center. The monkey's task is to move the handle to  
536 the target that he believes will ultimately receive the majority of tokens. The monkey is allowed to  
537 make the decision as soon as he feels sufficiently confident, and has 500ms to bring the cursor into a  
538 target after leaving the center. When the monkey reaches a target, the remaining tokens move more  
539 quickly to their final targets (“post-decision interval”, which was either 150ms in “Slow” blocks or  
540 50ms in “Fast” blocks (in a few sessions, the post-decision interval was reduced to 20ms in fast  
541 blocks). Once all tokens have jumped, visual feedback is provided to the monkey (the chosen target  
542 turns green for correct choices or red for error trials) and a drop of water or fruit juice is delivered for  
543 choosing the correct target. A 1500ms inter-trial interval precedes the following trial. We alternated  
544 between Slow and Fast blocks after about 75-125 trials, typically several times in each recording  
545 session.

546 The monkeys were also trained to perform a delayed reach (DR) task (usually 30-48 trials per  
547 recording session). In this task, the monkey again begins by placing the cursor in the central circle  
548 containing the 15 tokens. Next, one of six peripheral targets is presented (1.75cm radius, spaced at 60°  
549 intervals around a 5cm radius circle) and after a variable delay (500±100ms), the 15 tokens  
550 simultaneously jump into that target. This “GO signal” instructs the monkey to move the handle to the  
551 target to receive a drop of juice. This task is used to determine cell's task response and tuning as well

552 as the animal's mean reaction time (RT), used as an estimate of the total delays attributable to sensory  
553 processing and response initiation. This quantity was then used to estimate the time of commitment in  
554 the tokens task. That is, the "decision time" (DT) in the tokens task was quantified as movement onset  
555 minus the mean RT from the DR task.

556 The tokens task allows us to calculate, at each moment in time, the "success probability" (SP)  
557 associated with choosing each target. To characterize the success probability profile for each trial, we  
558 calculated this quantity (with respect to the target ultimately chosen by the monkey) for each token  
559 jump (Figure 1b). For example, with a total of 15 tokens, if at a particular moment in time the right  
560 target contains  $N_R$  tokens, the left contains  $N_L$  tokens, and  $N_C$  tokens remain in the center, then the  
561 probability that the target on the right will ultimately be the correct one (i.e., the success probability of  
562 guessing right) is:

$$563 \quad p(R|N_R, N_L, N_C) = \frac{N_C!}{2^{N_C}} \sum_{k=0}^{\min(N_C, 7-N_L)} \frac{1}{k!(N_C-k)!} \quad (3)$$

564

565 Although each token jump in every trial was completely random, we could classify *a posteriori* some  
566 specific classes of trials embedded in the fully random sequence (e.g. Figure 1c). In previous studies,  
567 we defined "easy", "ambiguous", and "misleading" trials on the basis of their success probability  
568 profile defined with respect to the first token jump. In contrast, because here we were primarily  
569 interested in examining activity with respect to commitment, we defined these trial types according to  
570 the success probability with respect to commitment time, estimated to be 280ms before movement  
571 onset. A trial was classified as "easy" if the SP was above 0.5 five tokens before commitment, above  
572 0.55 three tokens before, and above 0.65 at the time of commitment. A trial was classified as  
573 "ambiguous" if SP was between 0.35 and 0.65 at five and three tokens before commitment as well as  
574 at the time of commitment. A trial was classified as "misleading" if SP was below 0.5 five tokens  
575 before commitment and then above 0.5 at the time of commitment. A trial was classified as "other" if  
576 it didn't meet any of these criteria. Note that these four classes are non-overlapping. In the "Slow"  
577 block, we defined "early" trials as those where  $DT < 1400$  and "late" as those where  $DT \geq 1400$ ms. In  
578 the "Fast" block, "early" trials were defined as those where  $DT < 950$  and "late" as those where  
579  $DT \geq 950$ ms.

580 In all tokens task trials, the targets were presented in opposite directions from the center, in two of six  
581 possible locations around the circle. Their placement was chosen according to the tuning of recorded  
582 cells, and in cases where a cell was not tuned, the leftmost and rightmost targets were used. Thus, in  
583 all cases there was a target to the left of the center and one to the right (sometimes at an oblique  
584 angle). Here, we grouped all of these into two groups: We defined the three targets between  $90^\circ$  and  
585  $270^\circ$  as "left" targets, and the other three as "right" targets, and did not examine directional tuning in  
586 any more detail.

587 For the analyses in the present report, we defined 28 task conditions as follows. First, we separated  
588 trials into those recorded during the "Slow" block and those recorded during the "Fast" block, and in  
589 each block we split trials into those in which a "left" target was chosen by the monkey and those in  
590 which a "right" target was chosen. This yields 4 main groups: Slow-Left, Slow-Right, Fast-Left, and  
591 Fast-Right. Next, we split each of these four main groups into Easy, Ambiguous, Misleading, and  
592 Other, yielding another 16 conditions (Slow-Easy-Left, Slow-Easy-Right, Slow-Ambiguous-Left,  
593 etc.). Finally, we again split our four main groups into Early and Late, yielding another 8 conditions  
594 (Slow-Early-Left, Slow-Early-Right, Slow-Late-Left, etc.).

## 595 Neural recording

596 Detailed methods for neural recording in PMd and M1 are described in Thura & Cisek<sup>36</sup>, and for  
597 recording in the globus pallidus in Thura & Cisek<sup>44</sup>. Recordings in dIPFC used the same methods as  
598 PMd/M1, and focused on the region just dorsal to the caudal end of the principal sulcus (Extended

599 Data Figure 1). We used 2-4 independently moveable electrodes for cortical recordings, and one  
600 electrode at a time for recordings in the globus pallidus. Thus, most of the cells whose activity is  
601 analyzed and reported here were not recorded simultaneously.

602 In all sessions, we focused on cells showing any change of activity in the tokens task, and monkeys  
603 were usually performing the task while we were searching for cells. When one or more task related  
604 cells were isolated, we ran a block of 30-48 trials of the DR task to determine spatial tuning and select  
605 a preferred target (PT) for each cell (i.e. the target associated with the highest firing rate during one or  
606 more task epochs). Next, we ran blocks of tokens task trials using the PT of an isolated cell and the  
607 180° opposite target (OT). We sometimes simultaneously recorded several task-related cells showing  
608 different spatial preferences, and since we always selected a single pair of targets, the actual best  
609 direction for all of the recorded cells was not always among these two. We usually started recording  
610 cells in the slow block because monkeys were more conservative in this condition. It was thus easier  
611 to assess cell properties online and more convenient to search for cells because fewer rewards were  
612 spent. When possible, cells were tested with multiple repetitions of slow and fast blocks to control for  
613 potential confounds related to evolving signals, elapsing time, and the monkey's fatigue or satiation  
614 (see Thura and Cisek<sup>43</sup> for control analyses on this question).

## 615 Data analysis

616 A neuron was included in the analysis if it was recorded in both Slow and Fast blocks, thus including  
617 trials in each of the four main conditions: Slow-Left, Slow-Right, Fast-Left, and Fast-Right. This  
618 constraint was satisfied by 637 neurons out of the total 736 recorded across all brain regions (277 in  
619 PMd, 191 in M1, 52 in dlPFC, 41 in GPe, and 46 in GPi). For each neuron and each trial, neural  
620 activity was aligned to movement onset and the firing frequency was computed using partial spike  
621 intervals in ninety 20ms-bins from 1400ms before to 400ms after movement onset. The firing rate was  
622 then square root transformed and smoothed using a 25ms Gaussian kernel. Finally, we imposed  
623 symmetry on our neural population by duplicating each of our neurons with an identical “anti-neuron”  
624 that has the same activity in all trials, but with the trial labels switched between left and right choices.  
625 We describe our rationale for including this step below in the section “Rationale for duplicating  
626 neurons”.

627 To calculate the principal components of neural activity, we then grouped trials into our four main  
628 classes (Slow-Left, Slow-Right, Fast-Left, Fast-Right). In each group, neural activity was averaged  
629 together for each individual neuron regardless of the type of trial (easy, ambiguous, misleading, or  
630 other) and regardless of whether the choice was correct or not, or the reaction time was early or late.  
631 For each of these four classes, we constructed a 60x1274 matrix where rows are time bins (from  
632 1000ms before to 200ms after movements onset) and columns are individual neurons. We then  
633 concatenated these four matrices into a 240x1274 matrix on which we performed standard Principal  
634 Component Analysis (using the *pca* function in Matlab 2019b), yielding a matrix of weights (“loading  
635 coefficients”) between cells and PCs as well as the variance explained by each PC. For further  
636 analysis, we only kept the top 20 PCs, which explained 97.9% of the total variance, though most of  
637 the interpretation will focus on the first four (total 80.3% of variance).

638 In addition to standard PCA, we also tried other dimensionality reduction methods, including factor  
639 analysis and Gaussian Process Factor Analysis (GPFA)<sup>68,70</sup>, but these yielded almost identical results  
640 (not shown). This is not surprising. For example, the major advantage of GPFA is that it jointly  
641 provides filtering with dimensionality reduction, which is critical when analyzing data from individual  
642 trials in which many neurons were recorded simultaneously. Our neurons were not recorded  
643 simultaneously, so we had to combine trials into similarity classes under the assumption that specific  
644 trial types were associated with similar neural activities on different occasions. This meant that we  
645 averaged activity across multiple similar trials, yielding much of the noise reduction that GPFA would  
646 have otherwise provided. Given the similarity of our results with different dimensionality reduction



647 techniques, we chose to use PCA because it is the simplest, most widely known and well-understood,  
648 and ultimately easiest to interpret.

649 Using the 1274x20 loading matrix, we computed the average neural activity profile along each PC for  
650 a given trial condition and a given population of neurons by multiplying each neuron's activity by its  
651 loading coefficient for that PC, summing all of these together, and dividing by the number of neurons  
652 in that population. We calculated confidence intervals around this average neural activity by randomly  
653 resampling trials, with replacement within a given trial condition, 1000 times for each neuron and  
654 time bin. We performed this process for all neurons together as well as for each of our neural  
655 populations separately (PMd, M1, dlPFC, GPe, and GPi).

656 Because not every neuron possessed a trial in each condition, potentially making it inappropriate to  
657 compare "PC space" trajectories from different conditions, we defined the following two groups of  
658 neurons designed to facilitate the analyses of primary interest. Group 1 consisted of neurons that  
659 possessed all conditions in the Slow block (Easy, Ambiguous, Misleading, Other, Early, and Late), for  
660 both Left and Right choices, as well as Early and Late conditions in the Fast block. This group was  
661 the focus of most of our analyses (e.g. Figure 3a,b; Figure 4; Figure 5), and included a total of 557  
662 cells (258 in PMd, 173 in M1, 50 in dlPFC, 35 in GPe, and 41 in GPi). To facilitate comparisons  
663 between trial types in the Fast block (e.g. Figure 3c,d), we also defined Group 2, which consisted of  
664 neurons that possessed Easy, Ambiguous, Misleading, and Other conditions in the Fast block. This  
665 group included 452 cells (226 in PMd, 126 in M1, 46 in dlPFC, and 27 each in GPe and GPi). When  
666 calculating the temporal profile along the principal components (e.g. Figure 2), we used Group 1  
667 neurons for all conditions except Easy, Ambiguous, Misleading, and Other trials in the Fast block.  
668 Although these definitions were used to make quantitative comparisons most accurate, they did not  
669 have a strong impact on the qualitative aspects of our data, which were similar even if we restricted all  
670 analyses to the 402 neurons that possessed trials in all 28 conditions (Extended Data Figure 6d).

671 Once we reconstructed the temporal profile along each PC for given conditions, we plotted each of  
672 them across time (Figure 2) and with respect to one another (e.g. Figure 3). To analyze the subspace  
673 visited by a neural population during the deliberation process, we examined PCs 1, 2, and 4 (see  
674 Figure 2) and constructed a 3-dimensional concave hull enclosing all of the neural states until the  
675 moment of commitment, for all conditions within a given block (using the *alphaShape* function in  
676 Matlab 2019b). For some of our brain regions this subspace resembles a thin 2-dimensional sheet,  
677 which we call the "decision manifold". To quantify its thickness, we compared its surface area /  
678 volume ratio with that of a perfect sphere with equal volume, using the equation  $\Psi = \frac{\pi^{1/3}(6V)^{2/3}}{A}$ ,  
679 where A is the surface area and V is the volume<sup>13</sup>. The quantity  $\Psi$  is called "sphericity", and is a  
680 dimensionless scalar that ranges from 0 for a 2D surface to 1 for a perfect sphere (the geometric shape  
681 with the smallest surface area / volume ratio). For the reader's intuition, we note that an equal-sided  
682 cube of any size has  $\Psi=0.806$  while a square sheet whose thickness is 1/50<sup>th</sup> of the length of each side  
683 has  $\Psi=0.171$ .

684 To characterize the loading matrix, we considered each cell as a point in a high-dimensional space  
685 defined by its loading coefficients for the top 11 PCs (which accounted for 95.2% of the total  
686 variance). We then fit the resulting distribution of points for cells in a given brain region with  
687 Gaussian Mixture Models (GMMs) using the Expectation-Maximization algorithm (*fitgmdist* function  
688 in Matlab 2019b). For each fit, we tried GMMs consisting of anywhere from one to six 11-  
689 dimensional gaussians, performing 100 randomly initialized fits for each, and then used the Bayesian  
690 Information Criterion (BIC) to select the best fitting model. We found that with 100 randomly  
691 initialized fits, we reliably found the same best solution each time.



## 692 Rationale for duplicating neurons

693 The rationale for duplicating the neurons stems from the fact that our population is inevitably a highly  
694 sparse under-sampling of the millions of neurons in the regions where we recorded. Importantly, we  
695 can assume that this under-sampling is not symmetric with respect to the proportions of neurons that  
696 contribute to movements to the left versus right. For example, we might have in our sample many  
697 high-firing cells preferring leftward movements, but fewer high-firing cells preferring rightward  
698 movements. Applying PCA to such asymmetrically under-sampled data will force the algorithm to try  
699 to capture this variance by aligning PCs to that asymmetry. We believe this is not informative. We can  
700 assume that our sampling is unlikely to be symmetric with respect to leftward or rightward  
701 movements, so it will not reflect any real asymmetry that may or may not exist in the brain. It will  
702 only distort our data in ways that will make interpretations more difficult.

703 For this reason, just before performing PCA we imposed symmetry on our data by using the “anti-  
704 neuron” approach classically used to produce population histograms of neural activity. In short, we  
705 assumed that for every given neuron that we recorded, there exists in the brain another neuron that we  
706 didn’t record, which has the same properties (same firing rate profile, same sensitivity to relevant  
707 variables, etc.) but has the opposite relationship with respect to the direction of movement. To  
708 implement this assumption, for each of our neurons we created a “sister” neuron with the same firing  
709 data except with the trial labels switched between left and right choices. We did this for all neurons  
710 regardless of whether they are tuned or not. All of the analyses shown in the main paper apply this  
711 anti-neuron duplication, but in the supplemental data we show analogous results obtained without that  
712 step. As can be seen (Extended Data Figure 7), the only difference is that the PCs produced without  
713 anti-neuron duplication are rotated and skewed versions of the ones produced after anti-neuron  
714 duplication, and their properties are slightly mixed between adjacent PCs. However, the general  
715 conclusions remain unchanged.

## 716 Control analyses

717 To determine whether the PCs we found in the population data are a trivial consequence of properties  
718 of single neurons (e.g. directional tuning), we applied a control based on the Tensor Maximum  
719 Entropy (TME) method of Elsayed & Cunningham<sup>84</sup>, using code they provide at  
720 <https://github.com/gamaleldin/TME>. Briefly, this method preserves the primary first and second order  
721 covariance in the data along the temporal, neural, and condition-dependent dimensions but is  
722 otherwise maximally random. For example, tuning is preserved but not correlated across time. Any  
723 metric applied to analyzing the real data can then be compared to that same metric applied to  
724 surrogate data sets. If the metric computed from the real data lies within the distribution of that metric  
725 computed from surrogate data, then whatever is measured by the metric is a simple consequence of  
726 first or second order covariance.

727 Here, we were interested to know whether our finding of PCs that covary with evidence is a simple  
728 consequence of cell tuning. To that end, we computed the correlation between the evidence provided  
729 by token jumps (e.g. Figure 1c) and the temporal profiles of the components generated by PCA when  
730 applied to surrogate data. Our metric was equal to the maximum absolute value of the correlation  
731 coefficient for any of the top 10 components. We calculated this metric for the components produced  
732 using the real data (in which the best correlation was with PC2) and compared it to the distribution of  
733 the metric for 100 surrogate data sets generated using the TME method. That is, for each of the 100  
734 surrogate data sets we performed PCA on the four main trial classes, then used these to calculate the  
735 temporal profile of the top 10 PCs for all trial types, correlated each of these with evidence, and used  
736 the highest correlation value. We consider the emergence of an evidence-related PC as a non-trivial  
737 consequence of tuning if the correlation metric of fewer than 5 of these 100 surrogate data sets is  
738 equal to or higher than the metric applied to the real data (i.e.  $p < 0.05$ ).

739

## 740 References

- 741 1. Cisek, P. & Kalaska, J. F. Neural Mechanisms for Interacting with a World Full of Action  
742 Choices. *Annual Review of Neuroscience* **33**, 269–298 (2010).
- 743 2. Gomez-Marin, A. & Ghazanfar, A. A. The Life of Behavior. *Neuron* **104**, 25–36 (2019).
- 744 3. Michalski, J., Green, A. M. & Cisek, P. Reaching decisions during ongoing movements. *Journal*  
745 *of Neurophysiology* **123**, 1090–1102 (2020).
- 746 4. Cisek, P. Cortical mechanisms of action selection: the affordance competition hypothesis.  
747 *Philosophical Transactions of the Royal Society B: Biological Sciences* **362**, 1585–1599 (2007).
- 748 5. Platt, M. L. & Glimcher, P. W. Neural correlates of decision variables in parietal cortex. *Nature*  
749 **400**, 233–238 (1999).
- 750 6. Roitman, J. D. & Shadlen, M. N. Response of Neurons in the Lateral Intraparietal Area during a  
751 Combined Visual Discrimination Reaction Time Task. *J. Neurosci.* **22**, 9475–9489 (2002).
- 752 7. Cisek, P. & Kalaska, J. F. Neural correlates of reaching decisions in dorsal premotor cortex:  
753 specification of multiple direction choices and final selection of action. *Neuron* **45**, 801–814  
754 (2005).
- 755 8. Kim, B. & Basso, M. A. Saccade target selection in the superior colliculus: a signal detection  
756 theory approach. *J. Neurosci.* **28**, 2991–3007 (2008).
- 757 9. Hernández, A. *et al.* Decoding a Perceptual Decision Process across Cortex. *Neuron* **66**, 300–  
758 314 (2010).
- 759 10. Klaes, C., Westendorff, S., Chakrabarti, S. & Gail, A. Choosing goals, not rules: deciding  
760 among rule-based action plans. *Neuron* **70**, 536–548 (2011).
- 761 11. Ratcliff, R. A Theory of Memory Retrieval. *Psychological Review* **85**, 59–108 (1978).
- 762 12. Ratcliff, R., Smith, P. L., Brown, S. D. & McKoon, G. Diffusion Decision Model: Current  
763 Issues and History. *Trends in Cognitive Sciences* **20**, 260–281 (2016).
- 764 13. Ditterich, J. Evidence for time-variant decision making. *European Journal of Neuroscience* **24**,  
765 3628–3641 (2006).
- 766 14. Cisek, P., Puskas, G. A. & El-Murr, S. Decisions in Changing Conditions: The Urgency-Gating  
767 Model. *Journal of Neuroscience* **29**, 11560–11571 (2009).
- 768 15. Gluth, S., Rieskamp, J. & Buchel, C. Deciding When to Decide: Time-Variant Sequential  
769 Sampling Models Explain the Emergence of Value-Based Decisions in the Human Brain.  
770 *Journal of Neuroscience* **32**, 10686–10698 (2012).
- 771 16. Thura, D., Beaugard-Racine, J., Fradet, C.-W. & Cisek, P. Decision making by urgency  
772 gating: theory and experimental support. *J. Neurophysiol.* **108**, 2912–2930 (2012).
- 773 17. Murphy, P. R., Boonstra, E. & Nieuwenhuis, S. Global gain modulation generates time-  
774 dependent urgency during perceptual choice in humans. *Nat Commun* **7**, 13526 (2016).
- 775 18. Farashahi, S., Ting, C.-C., Kao, C.-H., Wu, S.-W. & Soltani, A. Dynamic combination of  
776 sensory and reward information under time pressure. *PLoS Comput Biol* **14**, e1006070 (2018).
- 777 19. Palestro, J. J., Weichart, E., Sederberg, P. B. & Turner, B. M. Some task demands induce  
778 collapsing bounds: Evidence from a behavioral analysis. *Psychon Bull Rev* **25**, 1225–1248  
779 (2018).
- 780 20. Kawato, M. Internal models for motor control and trajectory planning. *Current Opinion in*  
781 *Neurobiology* **9**, 718–727 (1999).
- 782 21. Shadmehr, R. & Krakauer, J. W. A computational neuroanatomy for motor control. *Exp Brain*  
783 *Res* **185**, 359–381 (2008).
- 784 22. Franklin, D. W. & Wolpert, D. M. Computational mechanisms of sensorimotor control. *Neuron*  
785 **72**, 425–442 (2011).
- 786 23. Grossberg, S. Contour Enhancement, Short Term Memory, and Constancies in Reverberating  
787 Neural Networks. *Studies in Applied Mathematics* **52**, 213–257 (1973).
- 788 24. Amari, S. Dynamics of pattern formation in lateral-inhibition type neural fields. *Biol Cybern* **27**,  
789 77–87 (1977).
- 790 25. Cisek, P. Integrated neural processes for defining potential actions and deciding between them:  
791 a computational model. *J. Neurosci.* **26**, 9761–9770 (2006).
- 792 26. Wang, X.-J. Decision Making in Recurrent Neuronal Circuits. *Neuron* **60**, 215–234 (2008).

- 793 27. Wu, S., Hamaguchi, K. & Amari, S.-I. Dynamics and computation of continuous attractors.  
794 *Neural Comput* **20**, 994–1025 (2008).
- 795 28. Standage, D., You, H., Wang, D.-H. & Dorris, M. C. Gain Modulation by an Urgency Signal  
796 Controls the Speed–Accuracy Trade-Off in a Network Model of a Cortical Decision Circuit.  
797 *Front. Comput. Neurosci.* **5**, (2011).
- 798 29. Bullock, D. & Grossberg, S. Neural dynamics of planned arm movements: emergent invariants  
799 and speed-accuracy properties during trajectory formation. *Psychol Rev* **95**, 49–90 (1988).
- 800 30. Bullock, D., Cisek, P. & Grossberg, S. Cortical networks for control of voluntary arm  
801 movements under variable force conditions. *Cereb. Cortex* **8**, 48–62 (1998).
- 802 31. Churchland, M. M., Cunningham, J. P., Kaufman, M. T., Ryu, S. I. & Shenoy, K. V. Cortical  
803 preparatory activity: representation of movement or first cog in a dynamical machine? *Neuron*  
804 **68**, 387–400 (2010).
- 805 32. Wallis, J. D. & Miller, E. K. From rule to response: neuronal processes in the premotor and  
806 prefrontal cortex. *J. Neurophysiol.* **90**, 1790–1806 (2003).
- 807 33. Michelet, T., Duncan, G. H. & Cisek, P. Response competition in the primary motor cortex:  
808 corticospinal excitability reflects response replacement during simple decisions. *Journal of*  
809 *Neurophysiology* **104**, 119–127 (2010).
- 810 34. Pastor-Bernier, A. & Cisek, P. Neural correlates of biased competition in premotor cortex. *The*  
811 *Journal of Neuroscience: The Official Journal of the Society for Neuroscience* **31**, 7083–7088  
812 (2011).
- 813 35. Klein-Flügge, M. C. & Bestmann, S. Time-dependent changes in human corticospinal  
814 excitability reveal value-based competition for action during decision processing. *The Journal of*  
815 *Neuroscience: The Official Journal of the Society for Neuroscience* **32**, 8373–8382 (2012).
- 816 36. Thura, D. & Cisek, P. Deliberation and commitment in the premotor and primary motor cortex  
817 during dynamic decision making. *Neuron* **81**, 1401–1416 (2014).
- 818 37. Cai, X. & Padoa-Schioppa, C. Contributions of orbitofrontal and lateral prefrontal cortices to  
819 economic choice and the good-to-action transformation. *Neuron* **81**, 1140–1151 (2014).
- 820 38. Mink, J. W. The basal ganglia: focused selection and inhibition of competing motor programs.  
821 *Progress in Neurobiology* **50**, 381–425 (1996).
- 822 39. Redgrave, P., Prescott, T. J. & Gurney, K. The basal ganglia: a vertebrate solution to the  
823 selection problem? *Neuroscience* **89**, 1009–1023 (1999).
- 824 40. Turner, R. S. & Desmurget, M. Basal ganglia contributions to motor control: a vigorous tutor.  
825 *Current Opinion in Neurobiology* **20**, 704–716 (2010).
- 826 41. Dudman, J. T. & Krakauer, J. W. The basal ganglia: from motor commands to the control of  
827 vigor. *Current Opinion in Neurobiology* **37**, 158–166 (2016).
- 828 42. Thura, D., Cos, I., Trung, J. & Cisek, P. Context-dependent urgency influences speed-accuracy  
829 trade-offs in decision-making and movement execution. *J. Neurosci.* **34**, 16442–16454 (2014).
- 830 43. Thura, D. & Cisek, P. Modulation of Premotor and Primary Motor Cortical Activity during  
831 Volitional Adjustments of Speed-Accuracy Trade-Offs. *J. Neurosci.* **36**, 938–956 (2016).
- 832 44. Thura, D. & Cisek, P. The Basal Ganglia Do Not Select Reach Targets but Control the Urgency  
833 of Commitment. *Neuron* **95**, 1160-1170.e5 (2017).
- 834 45. Ding, L. & Gold, J. I. Separate, causal roles of the caudate in saccadic choice and execution in a  
835 perceptual decision task. *Neuron* **75**, 865–874 (2012).
- 836 46. Tai, L.-H., Lee, A. M., Benavidez, N., Bonci, A. & Wilbrecht, L. Transient stimulation of  
837 distinct subpopulations of striatal neurons mimics changes in action value. *Nat. Neurosci.* **15**,  
838 1281–1289 (2012).
- 839 47. Santacruz, S. R., Rich, E. L., Wallis, J. D. & Carmena, J. M. Caudate Microstimulation  
840 Increases Value of Specific Choices. *Curr. Biol.* **27**, 3375-3383.e3 (2017).
- 841 48. Amemori, K.-I., Amemori, S., Gibson, D. J. & Graybiel, A. M. Striatal Microstimulation  
842 Induces Persistent and Repetitive Negative Decision-Making Predicted by Striatal Beta-Band  
843 Oscillation. *Neuron* **99**, 829-841.e6 (2018).
- 844 49. Wang, L., Rangarajan, K. V., Gerfen, C. R. & Krauzlis, R. J. Activation of Striatal Neurons  
845 Causes a Perceptual Decision Bias during Visual Change Detection in Mice. *Neuron* **97**, 1369-  
846 1381.e5 (2018).

- 847 50. Arimura, N., Nakayama, Y., Yamagata, T., Tanji, J. & Hoshi, E. Involvement of the Globus  
848 Pallidus in Behavioral Goal Determination and Action Specification. *Journal of Neuroscience*  
849 **33**, 13639–13653 (2013).
- 850 51. Hoshi, E. Cortico-basal ganglia networks subserving goal-directed behavior mediated by  
851 conditional visuo-goal association. *Front. Neural Circuits* **7**, (2013).
- 852 52. Desmurget, M. & Turner, R. S. Testing Basal Ganglia Motor Functions Through Reversible  
853 Inactivations in the Posterior Internal Globus Pallidus. *Journal of Neurophysiology* **99**, 1057–  
854 1076 (2008).
- 855 53. Kalaska, J. F., Cohen, D. A., Hyde, M. L. & Prud'homme, M. A comparison of movement  
856 direction-related versus load direction-related activity in primate motor cortex, using a two-  
857 dimensional reaching task. *J. Neurosci.* **9**, 2080–2102 (1989).
- 858 54. Crammond, D. J. & Kalaska, J. F. Prior information in motor and premotor cortex: activity  
859 during the delay period and effect on pre-movement activity. *J. Neurophysiol.* **84**, 986–1005  
860 (2000).
- 861 55. Churchland, M. M. & Shenoy, K. V. Temporal complexity and heterogeneity of single-neuron  
862 activity in premotor and motor cortex. *J. Neurophysiol.* **97**, 4235–4257 (2007).
- 863 56. Hoshi, E. & Tanji, J. Distinctions between dorsal and ventral premotor areas: anatomical  
864 connectivity and functional properties. *Curr. Opin. Neurobiol.* **17**, 234–242 (2007).
- 865 57. Johnson, P. B., Ferraina, S., Bianchi, L. & Caminiti, R. Cortical networks for visual reaching:  
866 physiological and anatomical organization of frontal and parietal lobe arm regions. *Cereb.*  
867 *Cortex* **6**, 102–119 (1996).
- 868 58. Chandrasekaran, C., Peixoto, D., Newsome, W. T. & Shenoy, K. V. Laminar differences in  
869 decision-related neural activity in dorsal premotor cortex. *Nat Commun* **8**, 614 (2017).
- 870 59. Thura, D. & Cisek, P. A computational model of cortico-basal ganglia circuits for deciding  
871 between reaching actions. Program No. 606.13. 2019 Neuroscience Meeting Planner. Chicago,  
872 IL: Society for Neuroscience, 2019. Online. (2019).
- 873 60. Smith, A. C. & Brown, E. N. Estimating a state-space model from point process observations.  
874 *Neural Comput* **15**, 965–991 (2003).
- 875 61. Stopfer, M., Jayaraman, V. & Laurent, G. Intensity versus identity coding in an olfactory  
876 system. *Neuron* **39**, 991–1004 (2003).
- 877 62. Brown, S. L., Joseph, J. & Stopfer, M. Encoding a temporally structured stimulus with a  
878 temporally structured neural representation. *Nat. Neurosci.* **8**, 1568–1576 (2005).
- 879 63. Levi, R., Varona, P., Arshavsky, Y. I., Rabinovich, M. I. & Selverston, A. I. The role of sensory  
880 network dynamics in generating a motor program. *J. Neurosci.* **25**, 9807–9815 (2005).
- 881 64. Briggman, K. L., Abarbanel, H. D. I. & Kristan, W. B. From crawling to cognition: analyzing  
882 the dynamical interactions among populations of neurons. *Curr. Opin. Neurobiol.* **16**, 135–144  
883 (2006).
- 884 65. Broome, B. M., Jayaraman, V. & Laurent, G. Encoding and decoding of overlapping odor  
885 sequences. *Neuron* **51**, 467–482 (2006).
- 886 66. Churchland, M. M., Yu, B. M., Sahani, M. & Shenoy, K. V. Techniques for extracting single-  
887 trial activity patterns from large-scale neural recordings. *Curr. Opin. Neurobiol.* **17**, 609–618  
888 (2007).
- 889 67. Sasaki, T., Matsuki, N. & Ikegaya, Y. Metastability of active CA3 networks. *J. Neurosci.* **27**,  
890 517–528 (2007).
- 891 68. Yu, B. M. *et al.* Gaussian-process factor analysis for low-dimensional single-trial analysis of  
892 neural population activity. *J. Neurophysiol.* **102**, 614–635 (2009).
- 893 69. Shenoy, K. V., Sahani, M. & Churchland, M. M. Cortical control of arm movements: a  
894 dynamical systems perspective. *Annu. Rev. Neurosci.* **36**, 337–359 (2013).
- 895 70. Cunningham, J. P. & Yu, B. M. Dimensionality reduction for large-scale neural recordings. *Nat*  
896 *Neurosci* **17**, 1500–1509 (2014).
- 897 71. Thura, D. & Cisek, P. Monkey frontal cortex reflects the time course of changing evidence for  
898 reach decisions. Program No. 805.9. 2010 Neuroscience Meeting Planner. San Diego, CA:  
899 Society for Neuroscience, 2010. Online. (2010).



- 900 72. Thura, D. & Cisek, P. A cortico-basal ganglia network for dynamic decision-making. Program  
901 No. 359.06. 2018 Neuroscience Meeting Planner. San Diego, CA: Society for Neuroscience,  
902 2018. Online. (2018).
- 903 73. Cisek, P., Cabana, J.-F., Thura, D. & Feghaly, A. The dynamics of neural population activity  
904 during decision-making. Program No. 176.22. 2015 Neuroscience Meeting Planner. Chicago,  
905 IL: Society for Neuroscience, 2015. Online. (2015).
- 906 74. Cisek, P., Thura, D., Cabana, J.-F. & Feghaly, A. Neural dynamics of cortical and basal ganglia  
907 circuits during dynamic decision-making. Program No. 543.07. 2016 Neuroscience Meeting  
908 Planner. San Diego, IL: Society for Neuroscience, 2016. Online. (2016).
- 909 75. Thura, D., Guberman, G. & Cisek, P. Trial-to-trial adjustments of speed-accuracy trade-offs in  
910 premotor and primary motor cortex. *J. Neurophysiol.* **117**, 665–683 (2017).
- 911 76. Afshar, A. *et al.* Single-trial neural correlates of arm movement preparation. *Neuron* **71**, 555–  
912 564 (2011).
- 913 77. Churchland, M. M. *et al.* Neural population dynamics during reaching. *Nature* **487**, 51–56  
914 (2012).
- 915 78. Michaels, J. A., Dann, B., Intveld, R. W. & Scherberger, H. Predicting Reaction Time from the  
916 Neural State Space of the Premotor and Parietal Grasping Network. *J. Neurosci.* **35**, 11415–  
917 11432 (2015).
- 918 79. Kaufman, M. T. *et al.* The Largest Response Component in the Motor Cortex Reflects  
919 Movement Timing but Not Movement Type. *eneuro* **3**, ENEURO.0085-16.2016 (2016).
- 920 80. Michaels, J. A. & Scherberger, H. Population coding of grasp and laterality-related information  
921 in the macaque fronto-parietal network. *Sci Rep* **8**, (2018).
- 922 81. Raposo, D., Kaufman, M. T. & Churchland, A. K. A category-free neural population supports  
923 evolving demands during decision-making. *Nat. Neurosci.* **17**, 1784–1792 (2014).
- 924 82. Miri, A. *et al.* Behaviorally Selective Engagement of Short-Latency Effector Pathways by  
925 Motor Cortex. *Neuron* **95**, 683-696.e11 (2017).
- 926 83. Sauerbrei, B. A. *et al.* Cortical pattern generation during dexterous movement is input-driven.  
927 *Nature* **577**, 386–391 (2020).
- 928 84. Elsayed, G. F. & Cunningham, J. P. Structure in neural population recordings: an expected  
929 byproduct of simpler phenomena? *Nat. Neurosci.* **20**, 1310–1318 (2017).
- 930 85. Churchland, M. M. *et al.* Stimulus onset quenches neural variability: a widespread cortical  
931 phenomenon. *Nat Neurosci* **13**, 369–378 (2010).
- 932 86. Ames, K. C., Ryu, S. I. & Shenoy, K. V. Neural dynamics of reaching following incorrect or  
933 absent motor preparation. *Neuron* **81**, 438–451 (2014).
- 934 87. Gallego, J. A. *et al.* Cortical population activity within a preserved neural manifold underlies  
935 multiple motor behaviors. *Nat Commun* **9**, 4233 (2018).
- 936 88. Churchland, M. M., Yu, B. M., Ryu, S. I., Santhanam, G. & Shenoy, K. V. Neural variability in  
937 premotor cortex provides a signature of motor preparation. *J. Neurosci.* **26**, 3697–3712 (2006).
- 938 89. Hoshi, E., Shima, K. & Tanji, J. Task-dependent selectivity of movement-related neuronal  
939 activity in the primate prefrontal cortex. *J. Neurophysiol.* **80**, 3392–3397 (1998).
- 940 90. Rainer, G., Asaad, W. F. & Miller, E. K. Selective representation of relevant information by  
941 neurons in the primate prefrontal cortex. *Nature* **393**, 577–579 (1998).
- 942 91. Kim, J. N. & Shadlen, M. N. Neural correlates of a decision in the dorsolateral prefrontal cortex  
943 of the macaque. *Nat. Neurosci.* **2**, 176–185 (1999).
- 944 92. Quintana, J. & Fuster, J. M. From perception to action: temporal integrative functions of  
945 prefrontal and parietal neurons. *Cereb. Cortex* **9**, 213–221 (1999).
- 946 93. Fuster, J. M., Bodner, M. & Kroger, J. K. Cross-modal and cross-temporal association in  
947 neurons of frontal cortex. *Nature* **405**, 347–351 (2000).
- 948 94. Miller, E. K. The prefrontal cortex and cognitive control. *Nat. Rev. Neurosci.* **1**, 59–65 (2000).
- 949 95. Rowe, J. B., Toni, I., Josephs, O., Frackowiak, R. S. & Passingham, R. E. The prefrontal cortex:  
950 response selection or maintenance within working memory? *Science* **288**, 1656–1660 (2000).
- 951 96. Barraclough, D. J., Conroy, M. L. & Lee, D. Prefrontal cortex and decision making in a mixed-  
952 strategy game. *Nat. Neurosci.* **7**, 404–410 (2004).
- 953 97. Duque, J., Lew, D., Mazzocchio, R., Olivier, E. & Ivry, R. B. Evidence for two concurrent  
954 inhibitory mechanisms during response preparation. *J. Neurosci.* **30**, 3793–3802 (2010).



- 955 98. Leblois, A. Competition between Feedback Loops Underlies Normal and Pathological  
956 Dynamics in the Basal Ganglia. *Journal of Neuroscience* **26**, 3567–3583 (2006).
- 957 99. Schall, J. D. On building a bridge between brain and behavior. *Annu Rev Psychol* **55**, 23–50  
958 (2004).
- 959 100. Gold, J. I. & Shadlen, M. N. The Neural Basis of Decision Making. *Annu. Rev. Neurosci.* **30**,  
960 535–574 (2007).
- 961 101. Shadlen, M. N., Kiani, R., Hanks, T. D. & Churchland, A. K. Neurobiology of decision making:  
962 An intentional framework. in *Better than conscious? Decision making, the human mind, and*  
963 *implications for institutions* 71–101 (MIT Press, 2008).
- 964 102. Thompson, K. G., Hanes, D. P., Bichot, N. P. & Schall, J. D. Perceptual and motor processing  
965 stages identified in the activity of macaque frontal eye field neurons during visual search. *J.*  
966 *Neurophysiol.* **76**, 4040–4055 (1996).
- 967 103. Sato, T. R. & Schall, J. D. Effects of stimulus-response compatibility on neural selection in  
968 frontal eye field. *Neuron* **38**, 637–648 (2003).
- 969 104. Stanford, T. R., Shankar, S., Massoglia, D. P., Costello, M. G. & Salinas, E. Perceptual decision  
970 making in less than 30 milliseconds. *Nat. Neurosci.* **13**, 379–385 (2010).
- 971 105. de Lafuente, V., Jazayeri, M. & Shadlen, M. N. Representation of accumulating evidence for a  
972 decision in two parietal areas. *J. Neurosci.* **35**, 4306–4318 (2015).
- 973 106. Hernández, A., Zainos, A. & Romo, R. Temporal evolution of a decision-making process in  
974 medial premotor cortex. *Neuron* **33**, 959–972 (2002).
- 975 107. Coallier, É., Michelet, T. & Kalaska, J. F. Dorsal premotor cortex: neural correlates of reach  
976 target decisions based on a color-location matching rule and conflicting sensory evidence. *J.*  
977 *Neurophysiol.* **113**, 3543–3573 (2015).
- 978 108. Bogacz, R., Wagenmakers, E.-J., Forstmann, B. U. & Nieuwenhuis, S. The neural basis of the  
979 speed–accuracy tradeoff. *Trends in Neurosciences* **33**, 10–16 (2010).
- 980 109. Forstmann, B. U. *et al.* Cortico-striatal connections predict control over speed and accuracy in  
981 perceptual decision making. *Proceedings of the National Academy of Sciences* **107**, 15916–  
982 15920 (2010).
- 983 110. Nakahashi, A. & Cisek, P. Dynamics of the neural state in premotor and parietal cortex during  
984 multi-attribute decision-making. Program No. 228.01. 2019 Neuroscience Meeting Planner.  
985 Chicago, IL: Society for Neuroscience, 2019. Online. (2019).
- 986 111. Brown, J. W., Bullock, D. & Grossberg, S. How laminar frontal cortex and basal ganglia circuits  
987 interact to control planned and reactive saccades. *Neural Netw* **17**, 471–510 (2004).
- 988 112. Churchland, M. M., Afshar, A. & Shenoy, K. V. A central source of movement variability.  
989 *Neuron* **52**, 1085–1096 (2006).
- 990 113. Wadell, H. Volume, Shape, and Roundness of Quartz Particles. *The Journal of Geology* **43**,  
991 250–280 (1935).
- 992

1 **Unified neural dynamics of decisions and actions in the cerebral**  
2 **cortex and basal ganglia**

3 David Thura, Jean-François Cabana, Albert Feghaly, and Paul Cisek

4 Extended Data Figures 1-8

5 Supplemental analysis: Distinguishing gradients versus clusters of cell properties

6 Supplemental references

7

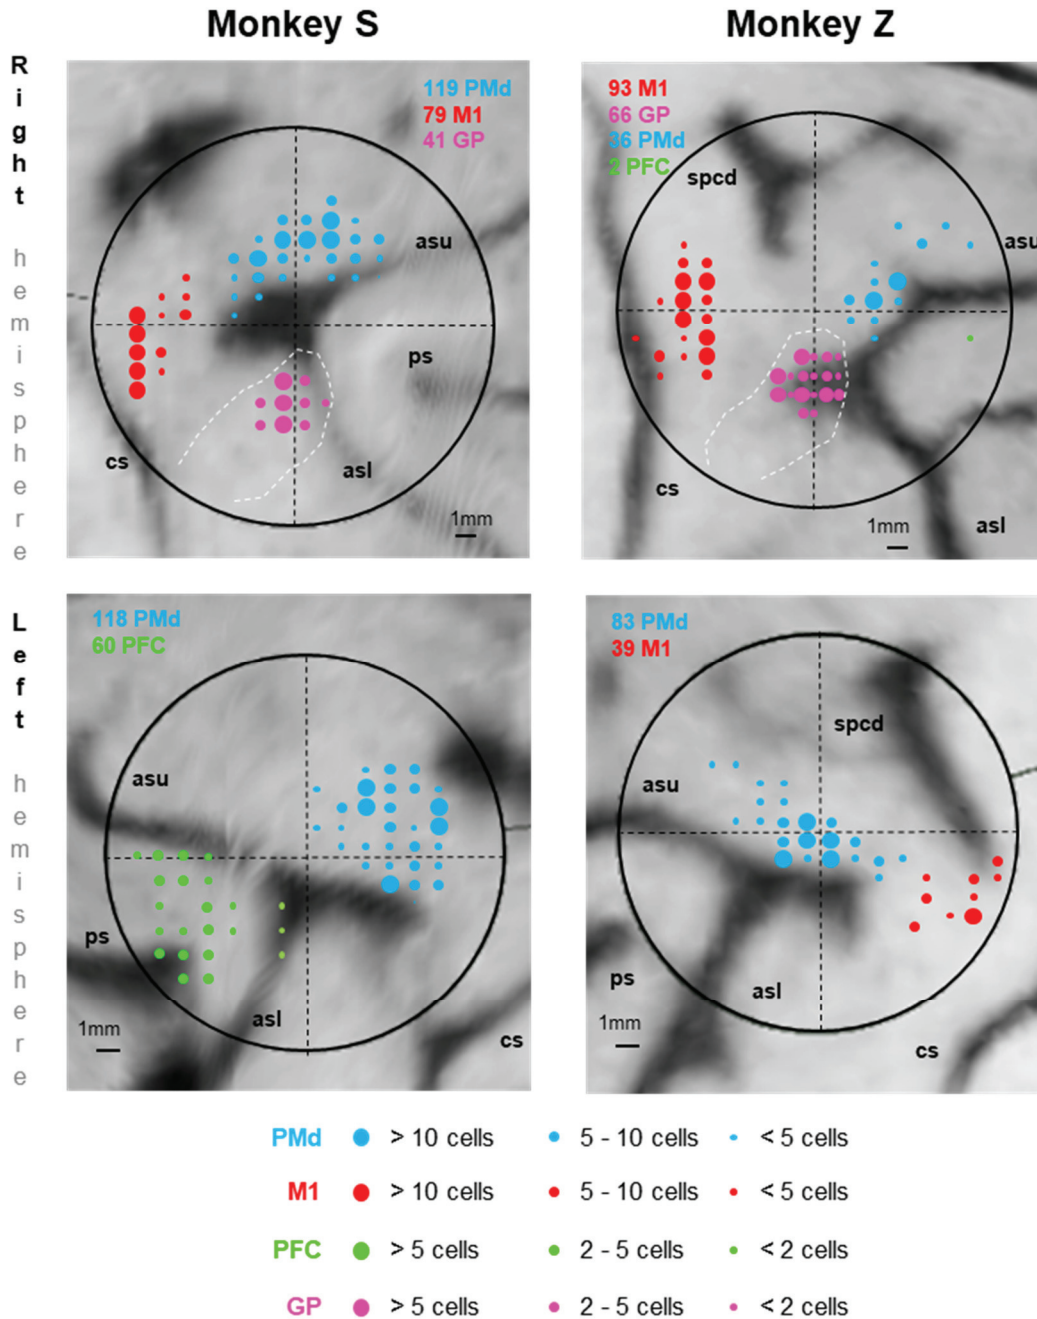

Extended Data Figure 1: Recording locations. Colored circles indicate the penetration locations of recorded neurons, superimposed over the reconstruction of the brain surface using Brainsight (Rogue Research). Large black circles indicate the extent of the recording chamber. Medial is up and anterior is to the right in the top panels and to the left in the bottom panels. Abbreviations: cs – central sulcus; ps – principal sulcus; asu – upper limb of the arcuate sulcus; asl – lower limb of the arcuate sulcus; spcd – superior precentral dimple.

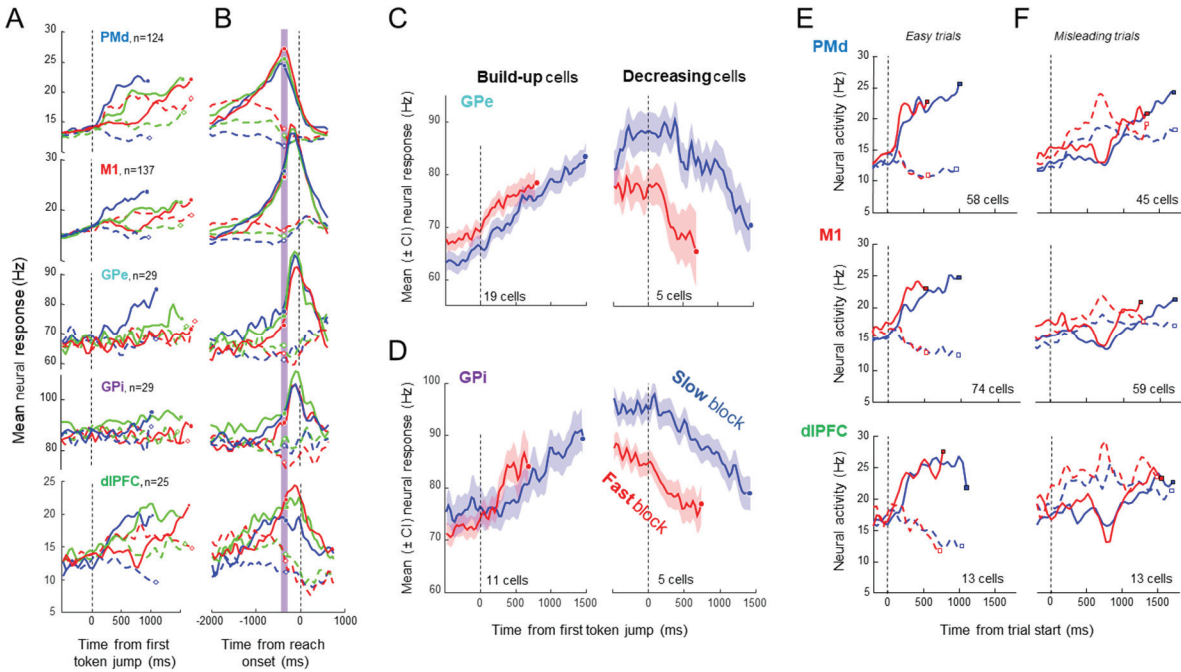

Extended Data Figure 2: Neural activity during the tokens task. **A.** Average activity of directionally tuned neurons in five brain regions, computed separately for choices in each neuron's preferred (solid) and opposite direction (dashed) for easy (blue), ambiguous (green), and misleading trials (red), during Slow blocks. Activity is aligned on the start of token jumps and truncated at decision commitment (circles), and only cells exhibiting tuning prior to movement onset are included. PMd: dorsal premotor cortex; M1: primary motor cortex; GPe: globus pallidus externus; GPi: globus pallidus internus; dlPFC: dorsolateral prefrontal cortex. **B.** Average activity of the same cells aligned on movement onset. The purple vertical bar indicates the estimated time of commitment, 280ms prior to movement onset. **C.** Average activity of build-up cells (left) and decreasing cells (right) in the GPe during Slow (blue) and Fast blocks (red), aligned on the first token jump. Shading indicates the 95% confidence interval. **D.** Same as C for cells in the GPi. **E.** Average neural activity in PMd, M1, and dlPFC during easy trials in Slow (blue) and Fast blocks (red), when the monkey chose the target in each neuron's preferred (solid) or opposite direction (dashed). Here, only cells recorded in both blocks are included. **F.** Same as E for activity during misleading trials. Except for the PFC results, data in A-D is reproduced [with permission] from Thura & Cisek (2017) and E-F from Thura & Cisek (2016).

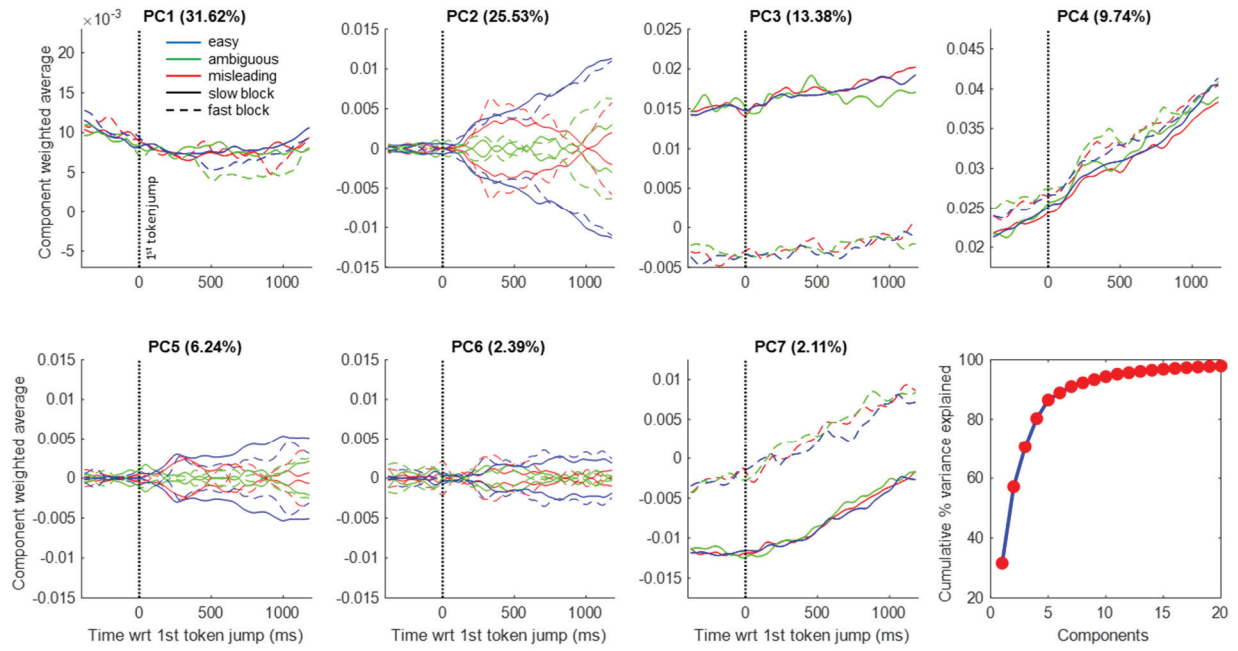

Extended Data Figure 3: The temporal profile of the principal components (as in Figure 2) computed using data aligned on the first token jump (dotted vertical line).



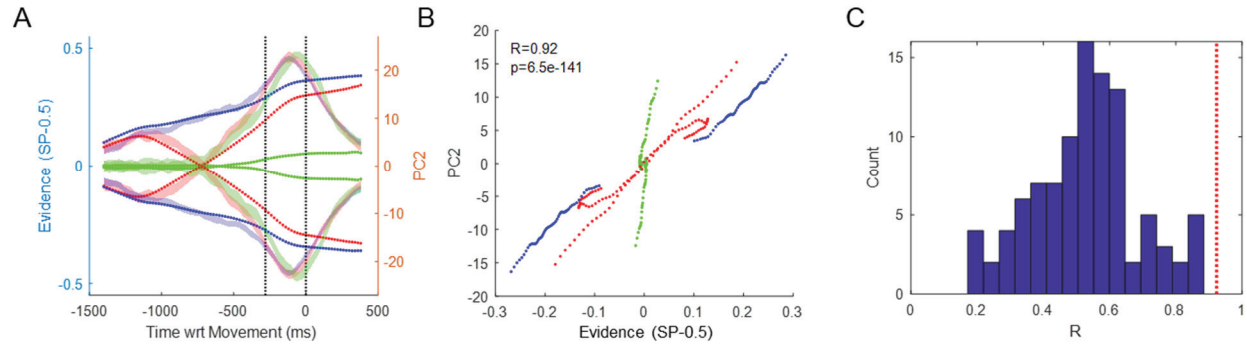

Extended Data Figure 4: Comparison between PC2 and sensory evidence. **A.** Dotted lines show the sensory evidence in easy (blue), ambiguous (green), and misleading trials (red) calculated as the difference between success probability for the right target and 0.5. Shaded ribbons show the mean and 95% confidence interval of PC2 in the same trials (Slow block). The first vertical dotted line indicates commitment and the second indicates movement onset, on which all data is aligned. The evidence trace is delayed by 300ms, which provides the best fit. Note that until the moment of commitment, the pattern of PC2 closely resembles the evidence, except for diverging toward one of the choices even in the absence of evidence during ambiguous trials). **B.** The same data, *prior to commitment*, plotted as evidence versus PC2 in these six trial conditions. The correlation coefficient is  $R=0.9234$  and  $p$ -value is well below 0.001. **C.** The distribution ( $N=100$ ) of correlation coefficients obtained by performing the same analysis on surrogate data sets generated using the Tensor Maximum Entropy approach (see Methods). Here, each surrogate data set is represented as the highest correlation coefficient of any of the top 10 PCs against the profile of evidence. The mean  $R$  is 0.5294 (s.t.d.=0.1615). For comparison, the red line shows the  $R$  value from the real data (panel B), and it is higher than all of the  $R$  values from surrogate data ( $p<0.01$ ).

12

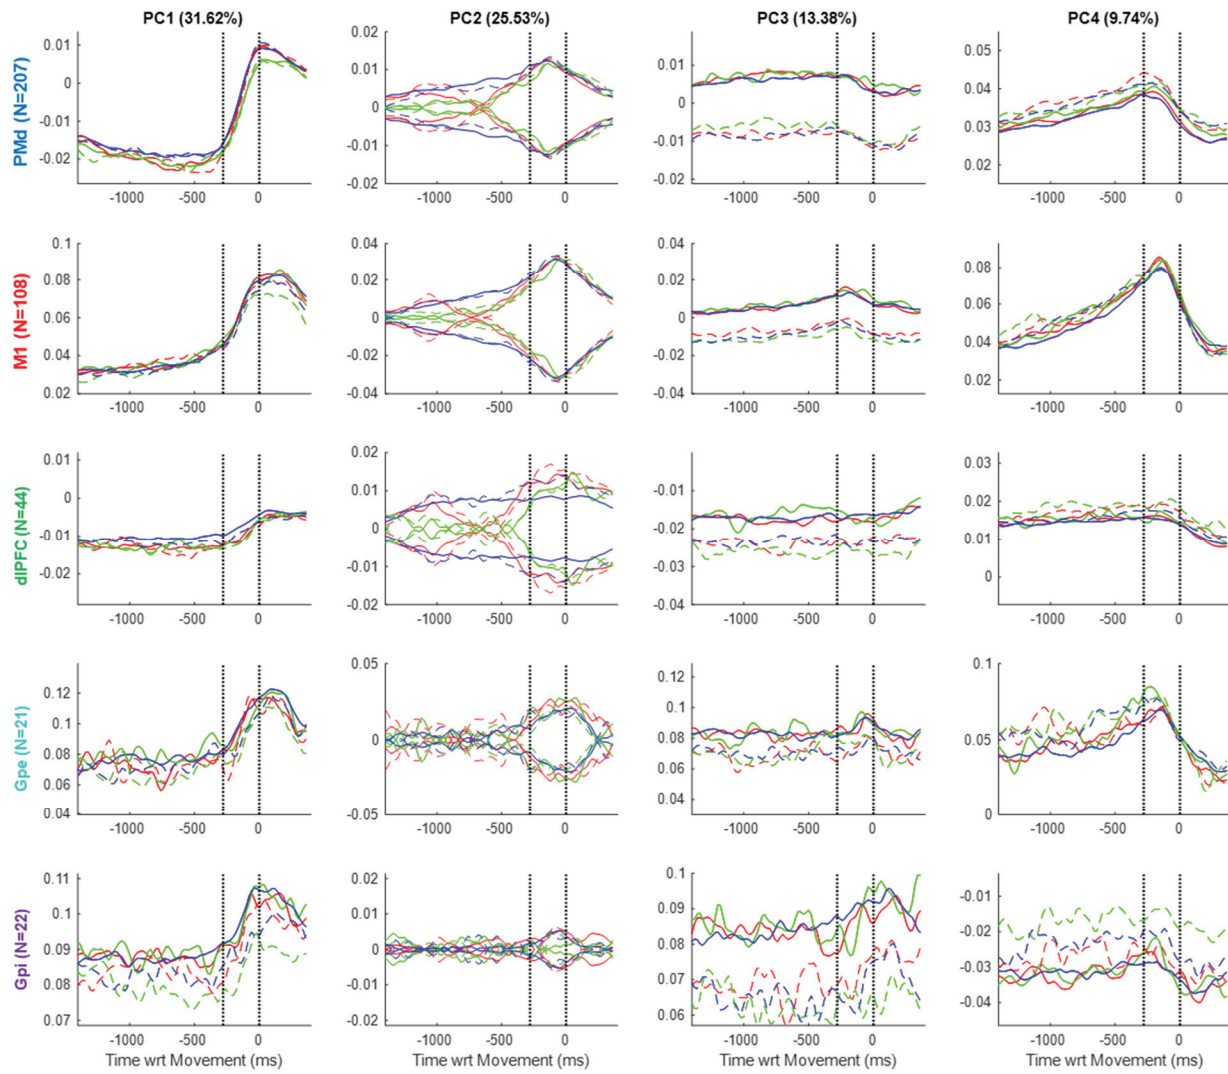

Extended Data Figure 5: The top four principal components shown in Figure 2, but here computed separately from each of the five brain regions. Note: To facilitate comparison between Slow and Fast blocks, here we only include cells that were recorded in all trial conditions.

13

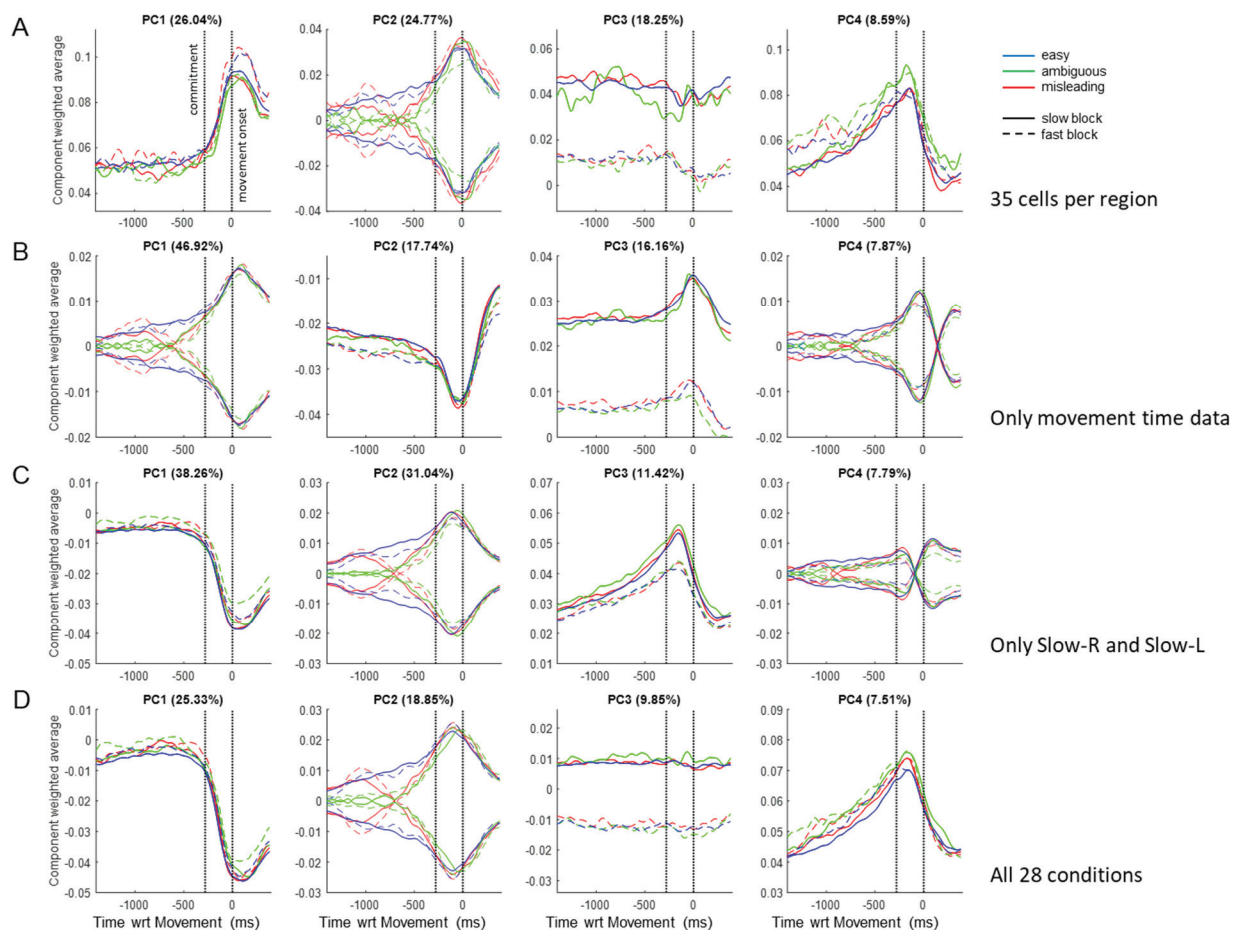

Extended Data Figure 6: The first four principal components produced by providing PCA with different subsets of the data and then using the resulting loading matrix to compute PC profiles for all trials. **A.** PCs generated using data from only 35 neurons per region. Note that all of the general features of the PCs are similar to those in Figure 2, although they are more noisy. **B.** PCs generated using data only from the 400ms immediately following movement onset. The transition from deliberation to movement is now captured by PC2, the evidence by PC1, and the SAT by PC3. In contrast with the results reported in the main text, here there is no component related to elapsing time like PC4 in Figure 2. **C.** PCs generated using only data from Slow-Left and Slow-Right conditions. In comparison with Figure 2, there is now no SAT-related component and PC1 is inverted (note that the sign is arbitrary in PCA components). **D.** PCs generated using all 28 conditions, including activity from the 402 cells that possessed all of the 28 trial types. Note the similarity with the PCs shown in Figure 2, except for the inversion of PC1.

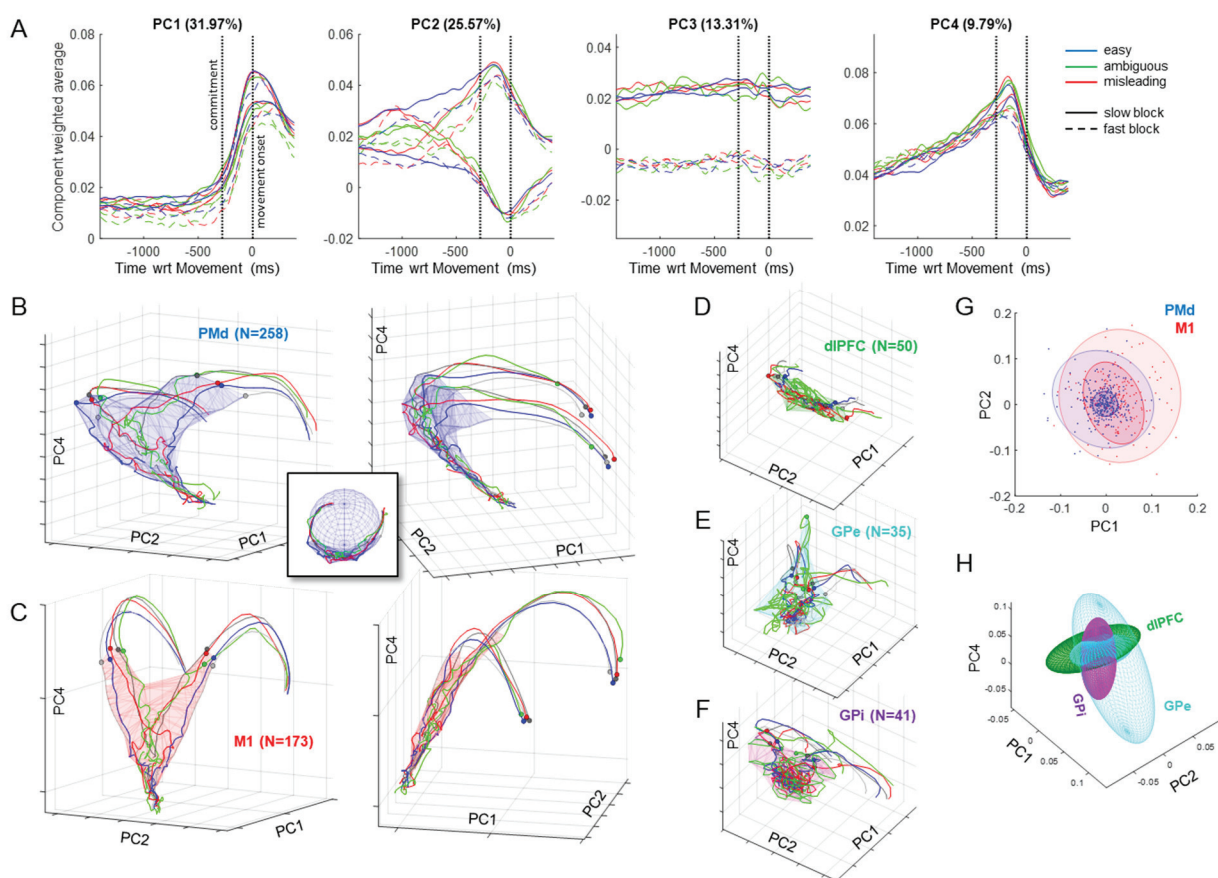

Extended Data Figure 7: Results produced without the cell duplication step. **A.** The first four principal components. Note the similarity to the PCs shown in Figure 2, except without the imposed symmetry. Thus, PCs 1, 3 and 4 are now slightly different for the two choices, and PC 2 is no longer perfectly symmetric. **B.** Two views of the 3-D trajectories in PMd. Dots indicate the moment of commitment on the left panel, and movement initiation on the right panel. Note that the decision manifold (blue wireframe) is still curved as in Figure 4a, and relatively well fit by a sphere (inset). **C.** Two views of M1, same format as A. Note that the decision manifold (red wireframe) is still flat as in Figure 4b. **D.** A view of dIPFC. **E.** GPe. **F.** GPi. For all populations, the patterns are similar as data processed using the cell duplication step, except that symmetry is lost. **G.** Analysis of loading matrices for PMd (blue) and M1 (red). Both are still best fit by a mixture of two gaussians similar to those shown on Figure 7a-d, but their orientations are now rotated. **H.** The distribution of loadings in dIPFC (green), GPe (cyan), and GPi (purple). While the dIPFC distribution is still similar to that in Figure 7f, GPe is now best fit by a 2-gaussian mixture and GPi is rotated. Nevertheless, despite the rotations the distributions of dIPFC and GPi are still roughly orthogonal.



## 16 Supplemental analysis: Distinguishing gradients versus clusters of cell properties

17 One of our key results is the apparent absence of distinct neural categories in our populations (Figure 7),  
18 arguing for a unified dynamical system of cells with continuous properties. However, is this continuity  
19 real or could it be an artifact of dimensionality reduction? To address this question, we created a variety  
20 of synthetic populations of neuron-like units, in which we deliberately created specific categories, and  
21 then applied to them the same analyses we used to examine real data. If our analyses fail to find these  
22 categories, then we cannot be confident that real categories do not exist in the real data. We attempted a  
23 variety of different ways to construct synthetic populations, but here report on two, each of which  
24 constructs synthetic units using combinations of the PCs we obtained from the real data (Figure 2).

25 The first population consisted of three distinct groups of cells. Group 1 consisted of 200 neurons with  
26 loading coefficients of 1 on PC1 and PC2, and zero for all others. Group 2 consisted of 200 neurons with  
27 loading of 1 on PC2 and PC4 and zero for all others. Group 3 consisted of 200 neurons with loading of 1  
28 on PC1 and PC4 and zero on others. These loading coefficients were multiplied by  $1+0.25N$ , where  $N$  is a  
29 normally distributed random variable with mean 0 and standard deviation 1. The synthetic activity of each  
30 cell was then computed as a sum of the temporal profile of each PC weighted by its loading coefficient  
31 for that cell. Finally, noise was added by multiplying the value of each bin of activity by a uniformly  
32 distributed random variable between 0 and 1.

33 We then subjected these synthetic units to exactly the same analyses we used for our real data, including  
34 square-root transformation, smoothing, and duplication. PCA analysis was then used to compute loading  
35 matrices of “synthetic” principal components (SPCs). The temporal profiles of the SPCs were then  
36 computed using a weighted sum of all units, and the loading matrix was analyzed using GMMs. For the  
37 synthetic data, we used 4-dimensional Gaussians to analyze the loading matrix.

38 As shown in Extended Data Figure 8a, the “synthetic” principal components (SPCs) almost perfectly  
39 capture the original PCs from which the cells were built, albeit in a different order (SPC1 is like PC2,  
40 SPC2 is like PC1, and SPC3 is like PC4). Furthermore, although the GMM analysis was applied to all  
41 600 units together, without information on how the different groups were built, it correctly identified the  
42 relevant clusters (Extended Data Figure 8b).

43 The second synthetic population consisted of 600 neurons that all had loading coefficients of 1 on PC1  
44 and PC2 and zero for others, again multiplied by  $1+0.25N$ , turned into activity profiles using a weighted  
45 sum of the real PCs 1 and 2, and multiplied by a random variable uniformly distributed between 0 and 1.  
46 Next, these 600 units were split into three groups: For “deliberation” units, activity before commitment  
47 was multiplied by 1, activity between commitment and movement was scaled by a number linearly  
48 dropping from 1 to zero, and activity after movement onset was set to zero. For “movement” units,  
49 activity before commitment was set to zero, activity between commitment and movement was scaled by a  
50 number linearly rising from zero to 1, and activity after movement onset was multiplied by 1. For  
51 “mixed” units, all activity was kept unchanged.

52 We then ran PCA and obtained the synthetic components shown in Extended Data Figure 8c. Note that  
53 SPC1 is similar to PC1, SPC2 is like PC2, but now we also find an SPC3 that looks like PC2 except for a  
54 switch of activity between deliberation and movement. This is reminiscent of some of the higher  
55 components we found in the neural data (see PC5 and PC6 in Figure 2). Importantly, *no such component*  
56 *was used to build the synthetic units*. So where did it come from? The answer lies in the PCA algorithm,  
57 which sequentially identifies components on the basis of variance explained. After finding SPC1 it  
58 discovered SPC2, which together explain a large proportion of activity for both “deliberation” and  
59 “mixed” units. Since no linear combination of these two components could explain “movement” units, the

60 next component (SPC3) captures some of the remaining unaccounted variance. In particular, note that a  
 61 linear combination of SPC2 plus 3 times SPC3 can cancel out deliberation activity and produce a  
 62 “movement” unit.

63 These observations on synthetic data suggest that the higher principal components we found in our real  
 64 data (PCs 5, 6, 7, etc.) also do not necessarily reveal additional “higher order” features of neural  
 65 dynamics, but simply result from the type of heterogeneity that has long been observed in sensorimotor  
 66 cortical regions<sup>1-6</sup>. But this then revives the question of functional clusters of real neurons – might distinct  
 67 categories exist in these regions? If they did, would our analysis of loading matrices identify them  
 68 correctly? Extended Data Figure 8d shows the result of GMM fits to the entire population of 600  
 69 synthetic units, again performed without any information on the underlying groups. Clearly, the relevant  
 70 clusters were found. In particular, “movement” units (red) were identified with two Gaussians (one for  
 71 right-tuned and one for left-tuned units), loaded positively onto SPC1, and onto both SPC2 and SPC3  
 72 with 3 times larger coefficients for the latter – consequently cancelling out their deliberation-time activity.  
 73 In contrast, “deliberation” units (blue) were identified with two oriented Gaussians orthogonal to those of  
 74 “movement” units and negatively loaded on SPC1. Finally, “mixed” units (green) were identified as  
 75 clusters lying in-between. This demonstrates that if distinct categories of neurons really did exist in the  
 76 real populations we recorded, the GMM analysis would have identified them correctly.

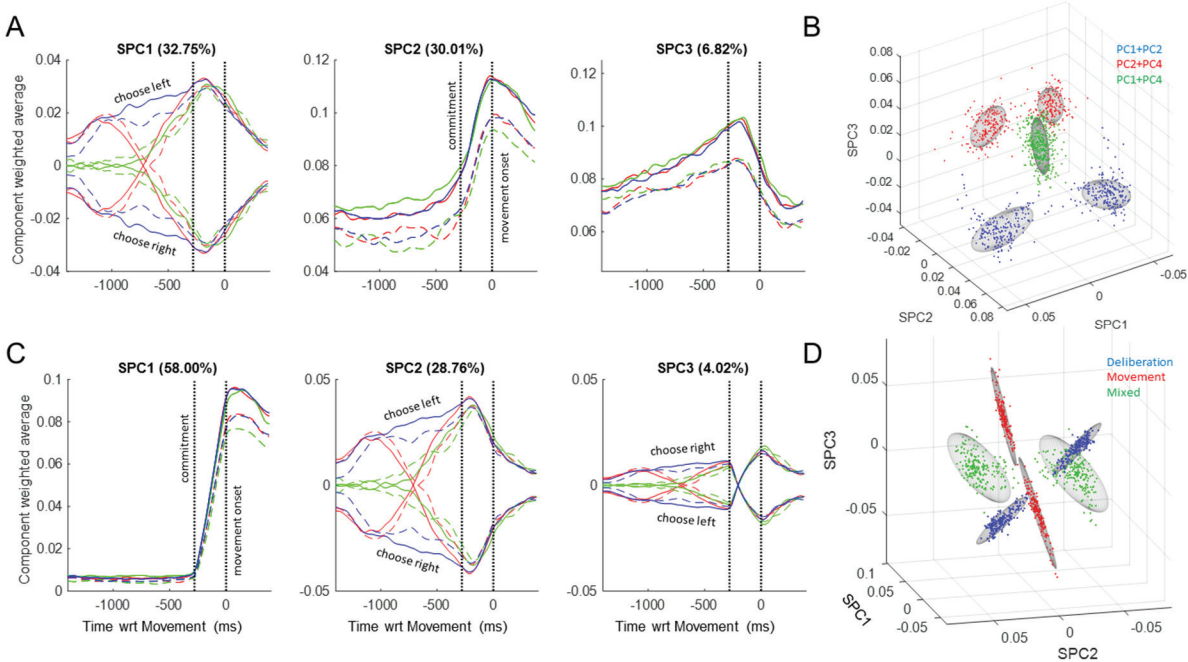

Extended Data Figure 8. Analyses of synthetic populations. **A.** The top 3 Synthetic PCs (SPCs) obtained from a population of 600 neurons constructed using combinations of the original PCs 1, 2, and 4 (see Figure 2). **B.** The loading coefficients of all 600 neurons, fitted with GMMs (gray ellipsoids). Colors indicate the three groups of neurons built with different combinations of those original PCs (see legend). **C.** The top 3 SPCs obtained from a population of 600 neurons constructed only using the original PC1 and PC2, but separated into three distinct categories: cells that are only active during deliberation, cells only active during movement, and cells active during both epochs. **D.** The loading coefficients of all 600 neurons, fitted with GMMs (gray ellipsoids). Colors indicate the three categories of neurons.

77

78

## 79 Supplemental references

- 80 1. Kalaska, J. F., Cohen, D. A., Hyde, M. L. & Prud'homme, M. A comparison of movement direction-  
81 related versus load direction-related activity in primate motor cortex, using a two-dimensional  
82 reaching task. *J. Neurosci.* **9**, 2080–2102 (1989).
- 83 2. Crammond, D. J. & Kalaska, J. F. Prior information in motor and premotor cortex: activity during the  
84 delay period and effect on pre-movement activity. *J. Neurophysiol.* **84**, 986–1005 (2000).
- 85 3. Wallis, J. D. & Miller, E. K. From rule to response: neuronal processes in the premotor and prefrontal  
86 cortex. *J. Neurophysiol.* **90**, 1790–1806 (2003).
- 87 4. Cisek, P. & Kalaska, J. F. Neural correlates of reaching decisions in dorsal premotor cortex:  
88 specification of multiple direction choices and final selection of action. *Neuron* **45**, 801–814 (2005).
- 89 5. Churchland, M. M. & Shenoy, K. V. Temporal complexity and heterogeneity of single-neuron activity  
90 in premotor and motor cortex. *J. Neurophysiol.* **97**, 4235–4257 (2007).
- 91 6. Hoshi, E. & Tanji, J. Distinctions between dorsal and ventral premotor areas: anatomical connectivity  
92 and functional properties. *Curr. Opin. Neurobiol.* **17**, 234–242 (2007).
- 93
